# Supplementary material for: Enantiocontrolled Preparation of ϒ-Substituted Cyclohexenones: Synthesis and Kinase Activity Assays of Cyclopropyl-Fused Cyclohexane Nucleosides
Source: MDPI journal article supplement (doi:10.3390/ijms23179704), 2022-08-26
Supplement: s1 [file s1]

## Supplementary Information for:

Enantiocontrolled preparation of  $\gamma$ -substituted cyclohexenones: synthesis and kinase activity assays of cyclopropyl-fused cyclohexane nucleosides

Sergio Jurado, <sup>1</sup> Beatriz Domínguez-Pérez,<sup>1</sup> Ona Illa, <sup>1</sup> Jan Balzarini, <sup>2</sup> Félix Busqué <sup>1,\*</sup> and Ramon Alibés <sup>1,\*</sup>

<sup>1</sup> Departament de Química, Universitat Autònoma de Barcelona, Bellaterra 08193, Barcelona, Spain.

<sup>2</sup> Laboratory of Virology and Chemotherapy (Rega Institute). KU Leuven, B-3000 Leuven, Belgium.

[ramon.alibes@uab.cat](mailto:ramon.alibes@uab.cat); [felix.busque@uab.cat](mailto:felix.busque@uab.cat)

## Table of contents

|                                                                                                                   |     |
|-------------------------------------------------------------------------------------------------------------------|-----|
| Asymmetric Transfer Hydrogenation (ATH) study on other cycloalkenones of five and seven-membered rings (Table S1) | S4  |
| Preparation of 1,4-dioxaspiro[4.5]dec-6-en-8-one, <b>4</b>                                                        | S6  |
| Preparation of (4 <i>R</i> )-4-hydroxycyclopent-2-en-1-one, ( <i>R</i> )- <b>S5</b>                               | S6  |
| Obtention of cyclopentanone, <b>S7</b> , and cyclopentan-1-ol, <b>S8</b>                                          | S7  |
| Preparation of (4 <i>R</i> )-4-Acetoxyoct-2-en-1-one, ( <i>R</i> )- <b>S11</b>                                    | S8  |
| Preparation of (1 <i>R</i> )-2-cyclohepten-1-ol, ( <i>R</i> )- <b>S12</b>                                         | S9  |
| <sup>1</sup> H- and <sup>13</sup> C-NMR spectra of compound <b>4</b>                                              | S10 |
| <sup>1</sup> H- and <sup>13</sup> C-NMR spectra of compound ( <i>R</i> )- <b>6</b>                                | S11 |
| <sup>1</sup> H-NMR spectrum of compound ( <i>S</i> )- <b>6</b>                                                    | S12 |
| <sup>1</sup> H- and <sup>13</sup> C-NMR spectra of compound ( <i>R</i> )- <b>1a</b>                               | S13 |
| <sup>1</sup> H-NMR spectrum of compound ( <i>S</i> )- <b>1a</b>                                                   | S14 |
| <sup>1</sup> H-NMR spectrum of compound ( <i>R</i> )- <b>1b</b>                                                   | S15 |
| <sup>1</sup> H-NMR spectrum of compound ( <i>S</i> )- <b>1b</b>                                                   | S15 |
| <sup>1</sup> H-NMR spectrum of mixture of compounds ( <i>R</i> )- <b>11</b> and <b>12</b>                         | S16 |
| <sup>1</sup> H-NMR spectrum of compound ( <i>R</i> )- <b>13</b>                                                   | S16 |
| <sup>1</sup> H-NMR spectrum of compound ( <i>R</i> )- <b>15</b>                                                   | S17 |
| <sup>1</sup> H- and <sup>13</sup> C-NMR spectra of compound <b>16</b>                                             | S18 |
| NOESY and COSY experiments for compound <b>16</b>                                                                 | S19 |
| HSQC experiment for compound <b>16</b>                                                                            | S20 |
| <sup>1</sup> H- and <sup>13</sup> C-NMR spectra of compound <b>18</b>                                             | S21 |
| <sup>1</sup> H- and <sup>13</sup> C-NMR spectra of compound <b>19</b>                                             | S22 |
| <sup>1</sup> H- and <sup>13</sup> C-NMR spectra of compound <b>20</b>                                             | S23 |
| <sup>1</sup> H- and <sup>13</sup> C-NMR spectra of a mixture of compounds <b>21</b> and <b>22</b>                 | S24 |
| NOESY experiment for a mixture of compounds <b>21</b> and <b>22</b>                                               | S25 |
| <sup>1</sup> H- and <sup>13</sup> C-NMR spectra of compound <b>23</b>                                             | S26 |
| <sup>1</sup> H- and <sup>13</sup> C-NMR spectra of compound <b>24</b>                                             | S27 |
| <sup>1</sup> H- and <sup>13</sup> C-NMR spectra of compound <b>25</b>                                             | S28 |
| <sup>1</sup> H- and <sup>13</sup> C-NMR spectra of compound <b>27</b>                                             | S29 |
| <sup>1</sup> H- and <sup>13</sup> C-NMR spectra of compound <b>2e</b>                                             | S30 |
| <sup>1</sup> H-NMR spectrum of compounds ( <i>R</i> )- <b>S5</b> and <b>S6</b>                                    | S31 |
| <sup>1</sup> H-NMR spectrum of compounds <b>S2</b> , <b>S7</b> and <b>S8</b>                                      | S31 |
| <sup>1</sup> H-NMR spectrum of compound ( <i>R</i> )- <b>S11</b>                                                  | S32 |
| <sup>1</sup> H-NMR spectrum of compound ( <i>R</i> )- <b>S12</b>                                                  | S32 |
| Enantiomeric purity                                                                                               | S33 |

|                                                               |     |
|---------------------------------------------------------------|-----|
| CHPLC of compounds ( <i>R</i> )- and ( <i>S</i> )- <b>1a</b>  | S33 |
| CHPLC of compounds ( <i>R</i> )- and ( <i>S</i> )- <b>11</b>  | S34 |
| CHPLC of compounds ( <i>R</i> )- and ( <i>S</i> )- <b>13</b>  | S35 |
| CHPLC of compounds ( <i>R</i> )- and ( <i>S</i> )- <b>15</b>  | S36 |
| CHPLC of compounds ( <i>R</i> )- and ( <i>S</i> )- <b>S5</b>  | S37 |
| CHPLC of compounds ( <i>R</i> )- and ( <i>S</i> )- <b>S11</b> | S38 |
| CHPLC of compounds ( <i>R</i> )- and ( <i>S</i> )- <b>S12</b> | S39 |
| Antiviral Activity Assays. Methods                            | S40 |
| Cytotoxicity and antiherpetic activity (Table S2)             | S40 |
| References                                                    | S41 |

## Asymmetric Transfer Hydrogenation (ATH) study on other cycloalkenones of five and seven-membered rings.

The ATH reaction has also been studied with the cycloalkenones **S1-S4** of five- and seven-membered rings using the optimized conditions ((*R,R*)-**5**, TBAC, and HCOONa in CH<sub>2</sub>Cl<sub>2</sub>/H<sub>2</sub>O 1:1, Table S1).

**Table S1.** Asymmetric Hydrogenation of Cycloalkenones **S1-S4**.

| Entry | Substrate                                                                                        | Products                                                                                                                                                                                            | Yield (%)         | Ratio <sup>a</sup> | %ee <sup>b</sup> |
|-------|--------------------------------------------------------------------------------------------------|-----------------------------------------------------------------------------------------------------------------------------------------------------------------------------------------------------|-------------------|--------------------|------------------|
| 1     | 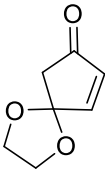<br><b>S1</b>   | <br><b>S5</b> <br><b>S6</b>       | 41                | 2:1                | 20               |
| 2     | <br><b>S2</b>  | <br><b>S7</b> <br><b>S8</b>     | n.a. <sup>c</sup> | 1:1                | --               |
| 3     | <br><b>S3</b> | <br><b>S9</b> <br><b>S10</b>  | 60                | 3:1                | 70 <sup>d</sup>  |
| 4     | <br><b>S4</b> | <br><b>S12</b> <br><b>S13</b> | 41                | 7:1                | 83               |

<sup>a</sup> Determined by <sup>1</sup>H-NMR. <sup>b</sup> Determined by chiral high-pressure liquid chromatography (CHPLC). <sup>c</sup> n.a.: not available. <sup>d</sup> Determined by chiral high-pressure liquid chromatography (CHPLC) on its *O*-acetyl derivative **S11**.

The ATH reduction of 1,4-cyclopentenedione monoethylene ketal **S1** and subsequent hydrolysis of the ketal furnished alcohol **S5** with low enantiomeric excess (20% ee) and its completely hydrogenated derivative **S6** in a 2:1 ratio (entry 1). The asymmetric reduction of the 2-cyclopentenone **S2**, did not afford the expected allylic alcohol but the cyclopentanone **S7** and the corresponding cyclopentanol **S8** (entry 2), suggesting a higher C=C selectivity. The results

suggest that a five-membered ring is detrimental to the enantioselectivity as well as the chemoselectivity of the reaction. The ATH reduction on the 1,4-cycloheptenedione monoethylene ketal **S3** followed by deprotection of the carbonyl group provided the corresponding alcohol **S9** with moderate enantiomeric excess (70% ee) along with the hydrogenated **S10** in a 3:1 ratio (entry 3). Finally, the asymmetric reduction of 2-cycloheptenone **S4** led to allylic alcohol **S12** with better enantioselectivity (83% ee) along with its totally hydrogenated derivative **S13** in a 7:1 ratio (entry 4). Thus, these results also suggest that the enantio- and chemoselectivity of the reaction are dependent on the size of the ring.

Overall, this study showed that among the cycloalkenones investigated, the best results were afforded with six-membered rings in both enantio- and C=O/C=C selectivity.

### 1,4-Dioxaspiro[4.5]decan-6-en-8-one, **4**

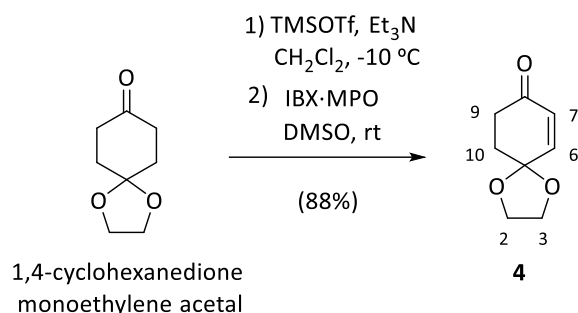

To a stirred solution of 1,4-cyclohexanedione monoethylene acetal (3.00 g, 18.7 mmol) and Et<sub>3</sub>N (5.20 mL, 37.3 mmol) in dry CH<sub>2</sub>Cl<sub>2</sub> (130 mL) at -10 °C, under nitrogen atmosphere, TMSOTf (4.20 mL, 23.2 mmol) was added dropwise, and the reaction mixture was stirred for 2 h and then concentrated under reduced pressure. Then, a solution of the resulting crude in DMSO (50 mL) was poured onto a solution of IBX (10.4 g, 37.3 mmol) and MPO (4.82 mg, 37.3 mmol) in DMSO (35 mL), that had been previously stirred during 1 h until becoming a clear solution. After 2 h of stirring at rt, CH<sub>2</sub>Cl<sub>2</sub> (150 mL) and a saturated aqueous NaHCO<sub>3</sub> solution (150 mL) were added. The two phases were separated, and the aqueous layer was extracted with CH<sub>2</sub>Cl<sub>2</sub> (2 x 100 mL). The combined organic extracts were concentrated under reduced pressure and washed with a solution of HCl 5% (100 mL) and brine (2 x 100 mL), dried (Na<sub>2</sub>SO<sub>4</sub>) and concentrated under vacuum to provide the known enone **4** (2.52 g, 16.4 mmol, 88% yield) as a yellow oil: <sup>1</sup>H NMR (250 MHz, CDCl<sub>3</sub>) δ 6.60 (d, *J*<sub>6,7</sub>=10.2 Hz, 1H, H-6), 5.99 (d, *J*<sub>7,6</sub>=10.2 Hz, 1H, H-7), 4.11 – 3.98 (m, 4H, H-2, H-3), 2.62 (t, *J*<sub>9,10</sub>=6.5 Hz, 2H, H-9), 2.19 (t, *J*<sub>10,9</sub>=6.5 Hz, 2H, H-10); <sup>13</sup>C NMR (90 MHz, CDCl<sub>3</sub>) δ 198.7 (C=O), 146.4 (C-6), 130.6 (C-7), 104.0 (C-5), 65.1 (C-2, C-3), 35.3/32.9 (C-9, C-10).

### (*4R*)-4-hydroxycyclopent-2-en-1-one, (*R*)-**S5**

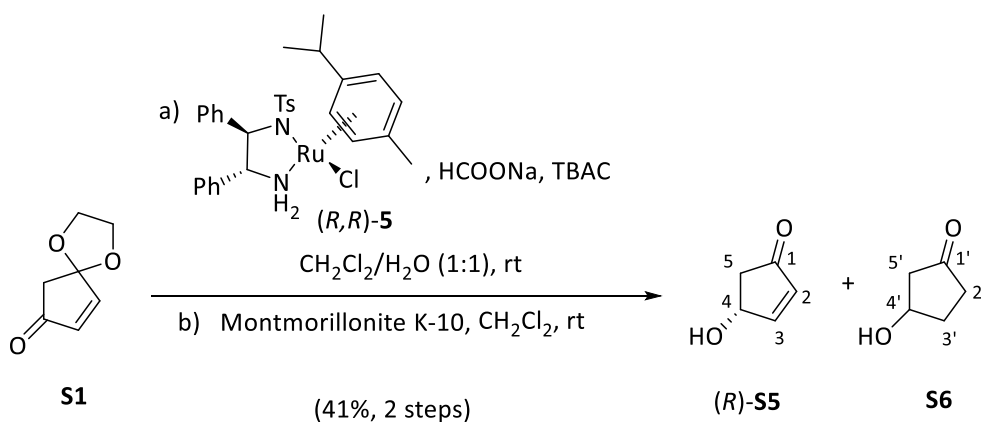

To a stirred solution of enone **S1** (28 mg, 0.20 mmol) in a biphasic media of CH<sub>2</sub>Cl<sub>2</sub> (0.7 mL) and water (0.7 mL) and under a nitrogen flux, tetrabutylammonium chloride (19 mg, 0.07 mmol),

sodium formate (46.3 mg, 0.68 mmol) and (*R,R*)-**5** (4.3 mg, 0.007 mmol) were sequentially added at rt. The reaction mixture was allowed to stir for 5 h. Then, CH<sub>2</sub>Cl<sub>2</sub> (1 mL) and water (1 mL) were added, the two phases were separated, and the aqueous layer was extracted with CH<sub>2</sub>Cl<sub>2</sub> (3 x 0.5 mL). The volatiles were removed under reduced pressure and the resulting crude was dissolved in CH<sub>2</sub>Cl<sub>2</sub> (1.9 mL) and Montmorillonite K-10 (105 mg) was added. The mixture was stirred at rt for 2 h. Then, it was filtered, and the solvent removed under vacuum to provide a 2:1 mixture of enone (*R*)-**S5** and keto alcohol **S6** (8 mg, 0.08 mmol, 41% yield for the two steps) as a pale-yellow oil. CHPLC (Daicel Chiralcel IC): 20% ee; <sup>1</sup>H NMR (250 MHz, CDCl<sub>3</sub>) ((*R*)-**S5**) δ 7.56 (dd, *J*<sub>3,2</sub>=5.7 Hz, *J*<sub>3,4</sub>=2.4 Hz, 1H, H-3), 6.24 (dd, *J*<sub>2,3</sub>= 5.7 Hz, *J*<sub>2,4</sub>=1.3 Hz, 1H, H-2), 5.06 (br s, 1H, H-4), 2.79 (dd, *J*<sub>gem</sub>=18.5 Hz, *J*<sub>5,4</sub>=6.1 Hz, 1H, H-5), 2.28 (dd, *J*<sub>gem</sub>=18.5 Hz, *J*<sub>5,4</sub>=2.2 Hz, 1H, H-5); (**S6**) δ: 4.64 (s, 1H, H-4'), 2.59 – 2.37 (m, 2H, H-5), 2.31 – 2.02 (m, 4H, H-2, H-3).

### Cyclopentanone, **S7**, and cyclopentan-1-ol, **S8**

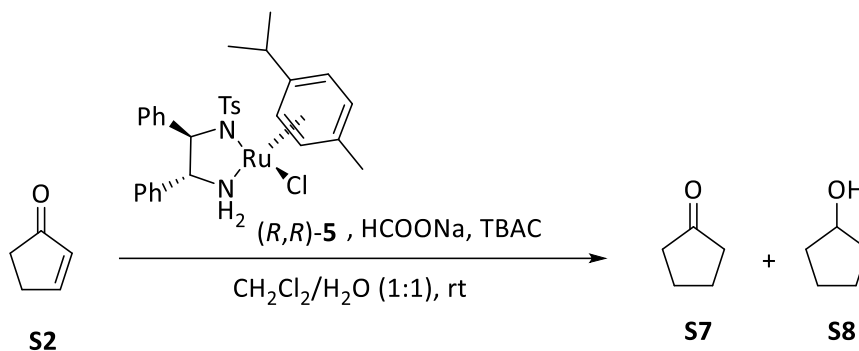

To a stirred solution of enone **S2** (500 μL, 5.85 mmol) in a biphasic media of CH<sub>2</sub>Cl<sub>2</sub> (19 mL) and water (19 mL) and under a nitrogen flux, tetrabutylammonium chloride (493 mg, 1.79 mmol), sodium formate (597 mg, 8.77 mmol) and (*R,R*)-**5** (110 mg, 0.18 mmol) were sequentially added at rt. The reaction mixture was allowed to stir for 24 h. After that time, more catalyst (*R,R*)-**5** (110 mg, 0.18 mmol) was added and the reaction was stirred for further 24 h. Then, a third batch of catalyst (*R,R*)-**5** (110 mg, 0.18 mmol) was added and the mixture was stirred for 24 h. Then, CH<sub>2</sub>Cl<sub>2</sub> (20 mL) and water (20 mL) were added, the two phases were separated, and the aqueous layer was extracted with CH<sub>2</sub>Cl<sub>2</sub> (3 x 20 mL). The volatiles of the organic phase were removed under reduced pressure to furnish a mixture of **S7**, **S8**, and starting material **S2**, in a 3:3:2 ratio as a yellowish oil. <sup>1</sup>H NMR (250 MHz, CDCl<sub>3</sub>) (**S2**) δ 7.75 (dt, *J*<sub>3,2</sub>=5.4 Hz, *J*<sub>3,4</sub>=*J*<sub>3,4</sub>=2.7 Hz, 1H, H-3), 6.23 (dt, *J*<sub>2,3</sub>=5.4 Hz, *J*<sub>2,5</sub>=*J*<sub>2,5</sub>=2.3 Hz, 1H, H-2), 2.72 (dq, *J*<sub>5,4</sub>=7.0 Hz, *J*<sub>5,2</sub>=*J*<sub>5,3</sub>=2.3 Hz, 2H, H-5), 2.41 – 2.35 (m, 2H, H-4); (**S7**) δ: 2.25 – 2.11 (m, 4H, H-2, H-5), 2.05 – 1.90 (m, 4H, H-3, H-4); (**S8**) δ: 4.48 – 4.26 (m, 1H, H-1), 3.38 (s, 1H, -OH), 1.85 – 1.72 (m, 4H, H-2, H-5), 1.66 – 1.54 (m, 4H, H-3, H-4).

**(4*R*)-4-Acetoxycyclohept-2-en-1-one, (*R*)-S11**

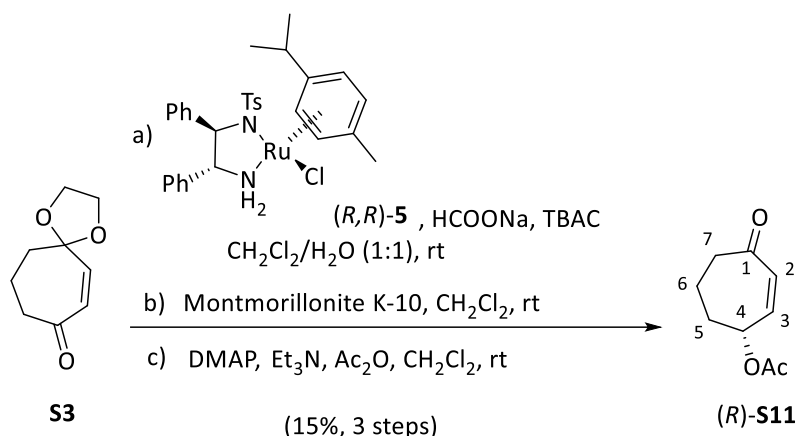

To a stirred solution of enone **S3** (35 mg, 0.21 mmol) in a biphasic media of  $\text{CH}_2\text{Cl}_2$  (0.69 mL) and water (0.69 mL) and under a nitrogen flux, tetrabutylammonium chloride (17 mg, 0.07 mmol), sodium formate (42 mg, 0.62 mmol) and (*R,R*)-**5** (4 mg, 0.006 mmol) were sequentially added at rt. The reaction mixture was allowed to stir for 5h. Then,  $\text{CH}_2\text{Cl}_2$  (20 mL) and water (20 mL) were added, the two phases were separated, and the aqueous layer was extracted with  $\text{CH}_2\text{Cl}_2$  (3 x 10 mL). The volatiles were removed under reduced pressure and the resulting crude was dissolved in  $\text{CH}_2\text{Cl}_2$  (2.6 mL) and montmorillonite K-10 (177 mg) was added. The mixture was stirred at rt for 2 h. Then, it was filtered, and the solvent removed under vacuum to provide a chromatographically inseparable 3:1 mixture of enone **S9** and keto alcohol **S10** (16 mg, 0.12 mmol, 60% yield for the two steps) as a pale yellow oil.

To a stirred solution of the reaction crude in dry  $\text{CH}_2\text{Cl}_2$  (0.16 mL), DMAP (0.59 mg, 4.75  $\mu\text{mol}$ ) and  $\text{Et}_3\text{N}$  (22  $\mu\text{L}$ , 0.16 mmol) were added followed by acetic anhydride (10  $\mu\text{L}$ , 0.11 mmol) dropwise. After stirring for 10 min, the reaction mixture was diluted with diethyl ether (1 mL) and a saturated aqueous  $\text{NaHCO}_3$  solution (1 mL). After separation, the aqueous layer was extracted with diethyl ether (3 x 1 mL) and the combined organics were washed with a saturated aqueous  $\text{NaHCO}_3$  solution and brine. The volatiles of the organic phase were removed under reduced pressure and the resulting residue was purified by column chromatography (hexanes:EtOAc 4:1) to furnish the protected alcohol (*R*)-**S11** (3 mg, 0.02 mmol, 15% yield for the three steps) as a yellowish oil: CHPLC (Daicel Chiralcel AD-H): 70% ee;  $[\alpha]_{\text{D}}^{20} = +90.2$  (c 0.27,  $\text{CHCl}_3$ ) [lit:[1]  $[\alpha]_{\text{D}}^{20} = +113.2$  (c 0.5,  $\text{CHCl}_3$ ), 86% ee];  $^1\text{H}$  NMR (250 MHz,  $\text{CDCl}_3$ )  $\delta$  6.43 (ddd,  $J_{3,2}=12.6$  Hz,  $J_{3,4}=3.4$  Hz,  $J_{3,5}=1.1$  Hz, 1H, H-3), 6.02 (dd,  $J_{2,3}=12.6$  Hz,  $J_{2,4}=2.2$  Hz, 1H, H-2), 5.67 – 5.51 (m, 1H, H-4), 2.71 – 2.56 (m, 2H, H-7), 2.27 – 2.12 (m, 1H, H-5), 2.10 (s, 3H,  $-\text{CH}_3$ ), 1.96 – 1.81 (m, 3H, H-5, 2H-6).



**(1*R*)-2-cyclohepten-1-ol, (*R*)-S12**

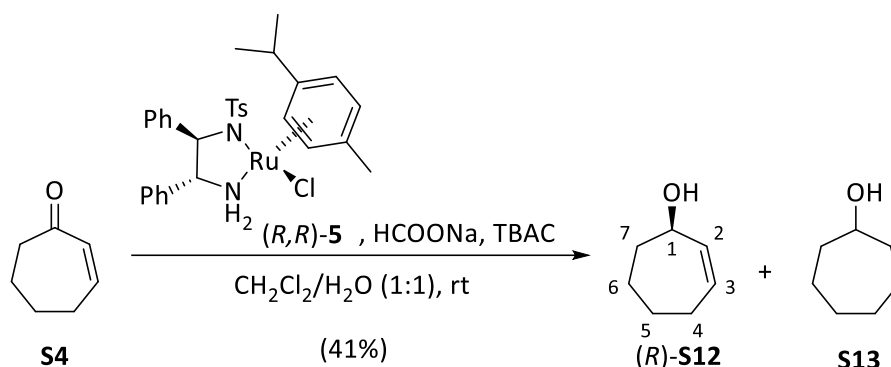

To a stirred solution of enone **S4** (500  $\mu\text{L}$ , 3.59 mmol) in a biphasic media of  $\text{CH}_2\text{Cl}_2$  (12 mL) and water (12 mL) and under a nitrogen flux, tetrabutylammonium chloride (299 mg, 1.08 mmol), sodium formate (732 mg, 10.8 mmol) and (*R,R*)-**5** (68.5 mg, 0.11 mmol) were sequentially added at rt. The reaction mixture was allowed to stir for 24 h. Then,  $\text{CH}_2\text{Cl}_2$  (12 mL) and water (12 mL) were added, the two phases were separated, and the aqueous layer was extracted with  $\text{CH}_2\text{Cl}_2$  (3 x 5 mL). The volatiles of the organic phase were removed under reduced pressure to furnish a 7:1 mixture of allylic alcohol (*R*)-**S12** and the totally hydrogenated derivative **S13** which was purified by column chromatography ( $\text{CHCl}_3$ ) to furnish the allylic alcohol (*R*)-**S12** (165 mg, 1.47 mmol, 41% yield) as a yellowish oil: CHPLC (Daicel Chiralcel IC): 83% ee;  $[\alpha]_{\text{D}}^{20} = +19.5$  (c 1.4,  $\text{CHCl}_3$ ) [lit:[2]  $[\alpha]_{\text{D}}^{20} = +28.2$  (c 1.03,  $\text{CHCl}_3$ ), >99% ee];  $^1\text{H}$  NMR (400 MHz,  $\text{CDCl}_3$ )  $\delta$  5.79 – 5.69 (m, 2H, H-2, H-3), 4.42 – 4.36 (m, 1H, H-1), 2.23 – 2.13 (m, 1H, H-7), 2.08 – 1.97 (m, 1H, H-7), 1.96 – 1.82 (m, 2H, H-4), 1.71 – 1.51 (m, 3H, 2H-6, H-5), 1.41 – 1.30 (m, 1H, H-5);  $^{13}\text{C}$  NMR (100 MHz,  $\text{CDCl}_3$ )  $\delta$ : 138.0 (C-2), 130.3 (C-3), 72.3 (C-1), 36.9 (C-7), 28.8 (C-4), 27.0/26.9 (C-5, C-6).

Chroma-tography (pentane/diethyl ether 7:1) afforded alcohol9b(126 mg, 94%) of >99%ee[GC,  $\gamma$  Lipodexg,  $t_{\text{R}}$  (9b) = 13.95 min,  $t_{\text{R}}$ (ent-9b) = 14.06 min] as a colorless oil:  $[\alpha]_{\text{D}}^{20} = 28.2$  (c 1.03,  $\text{CH}_2\text{Cl}_2$ )

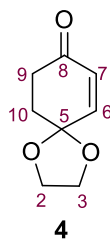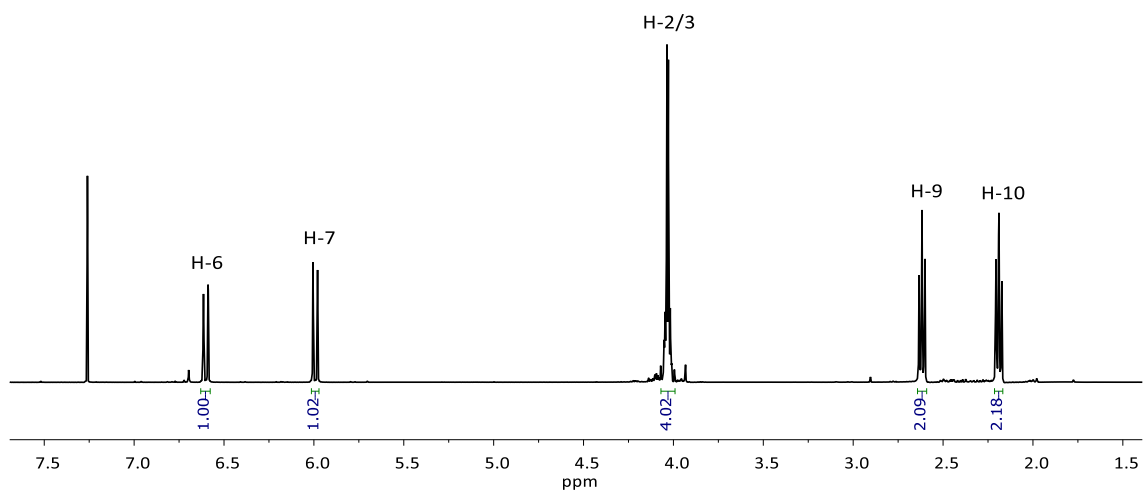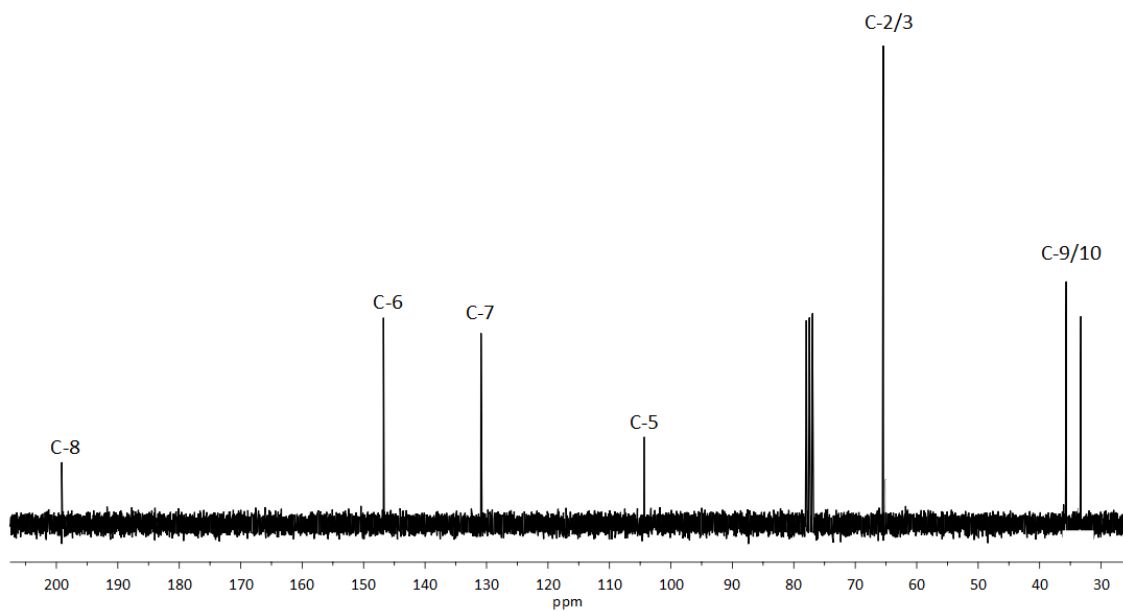

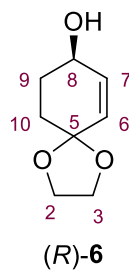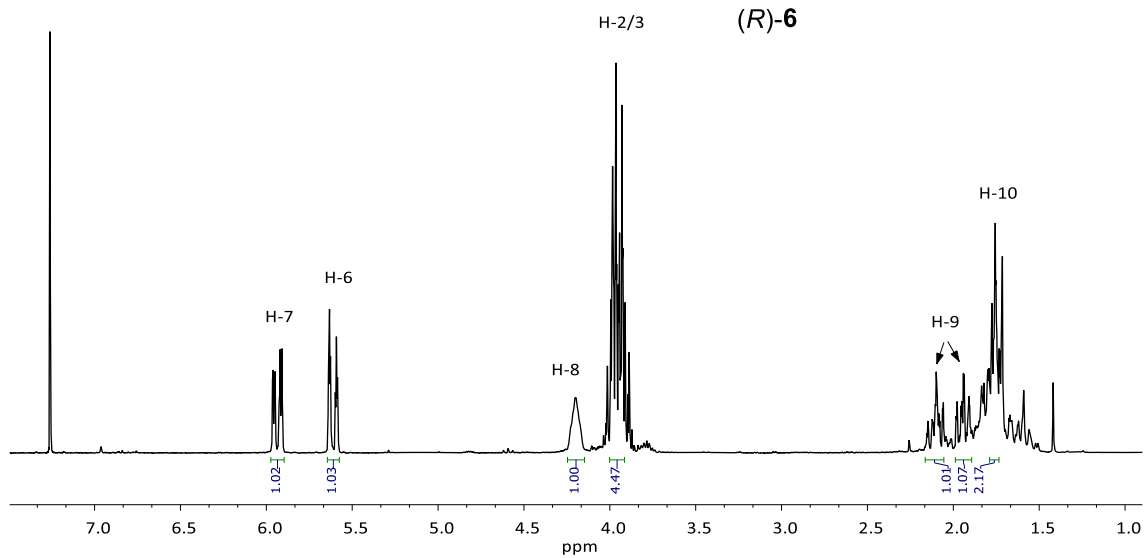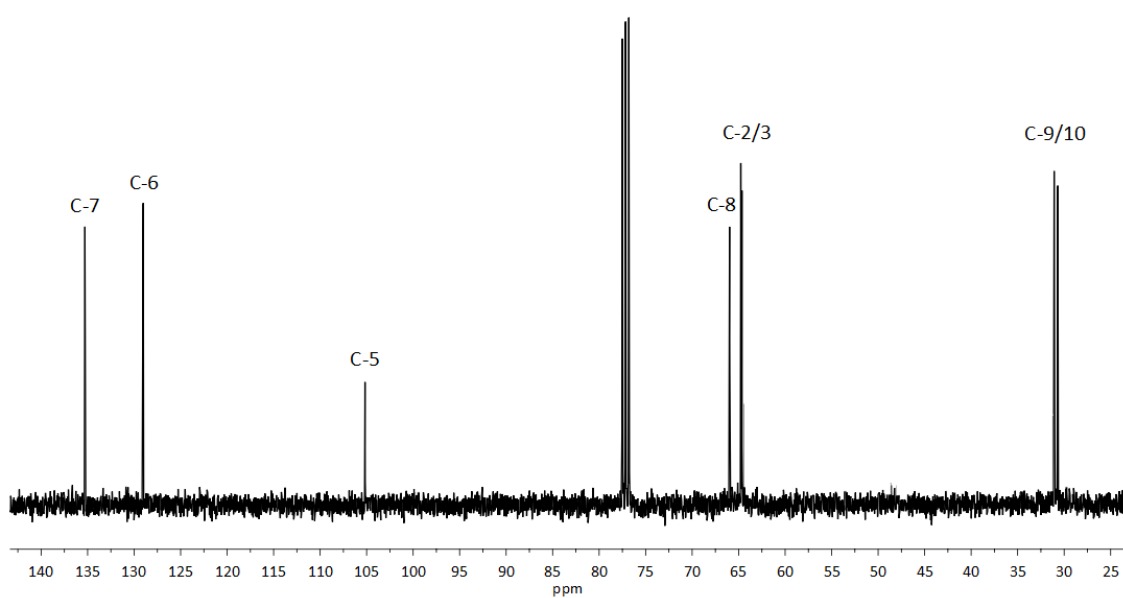

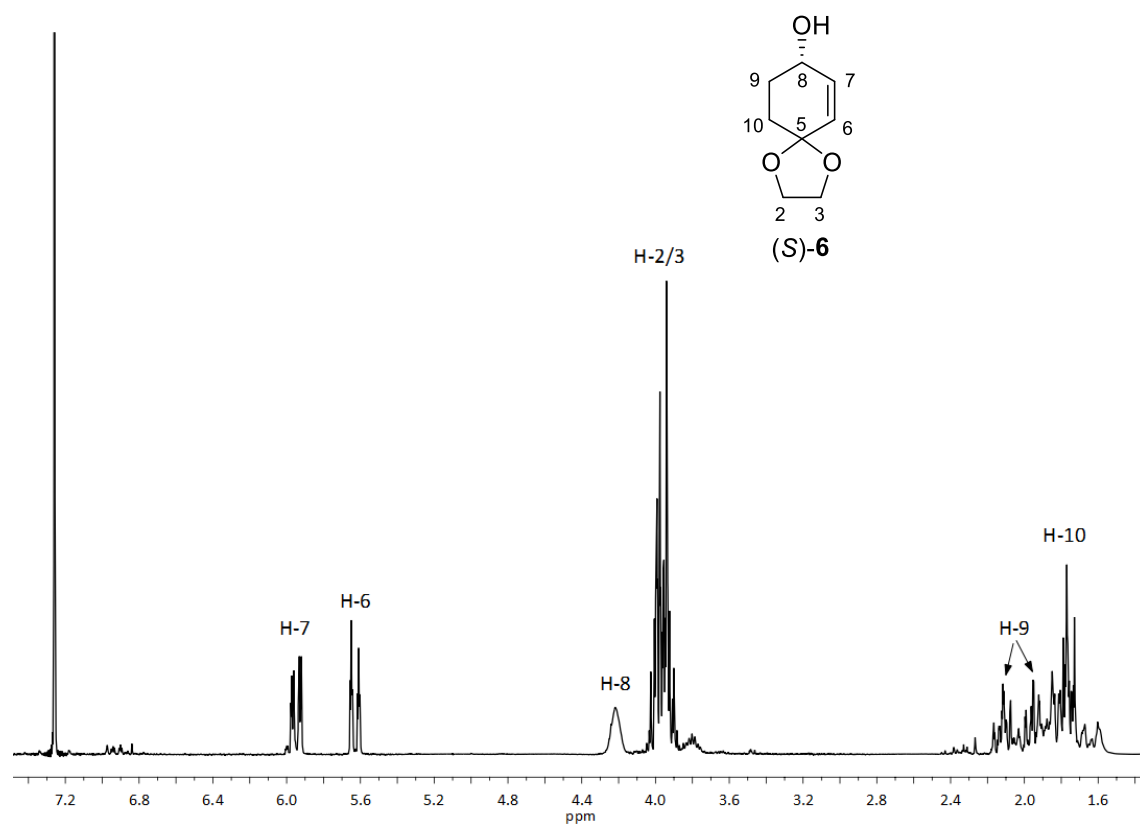

$^1\text{H}$  NMR (250 MHz,  $\text{CDCl}_3$ )

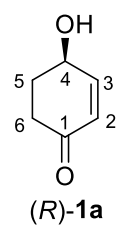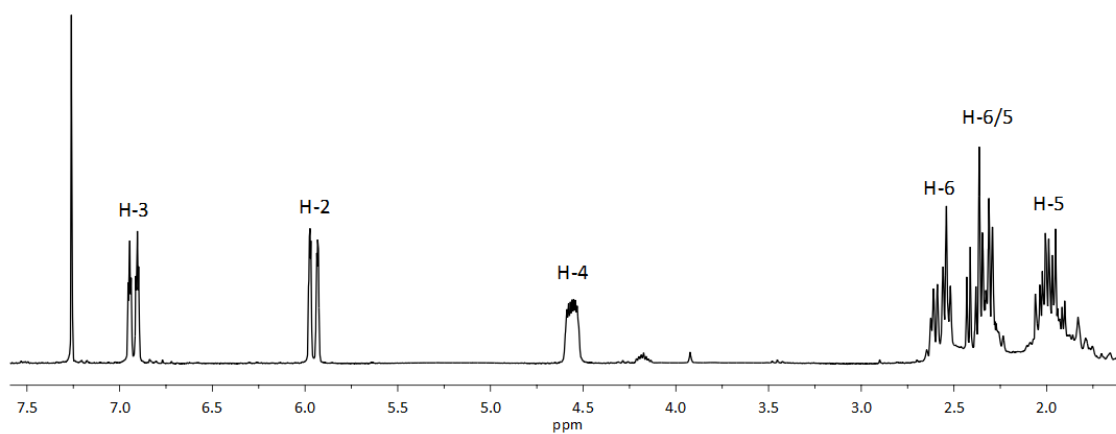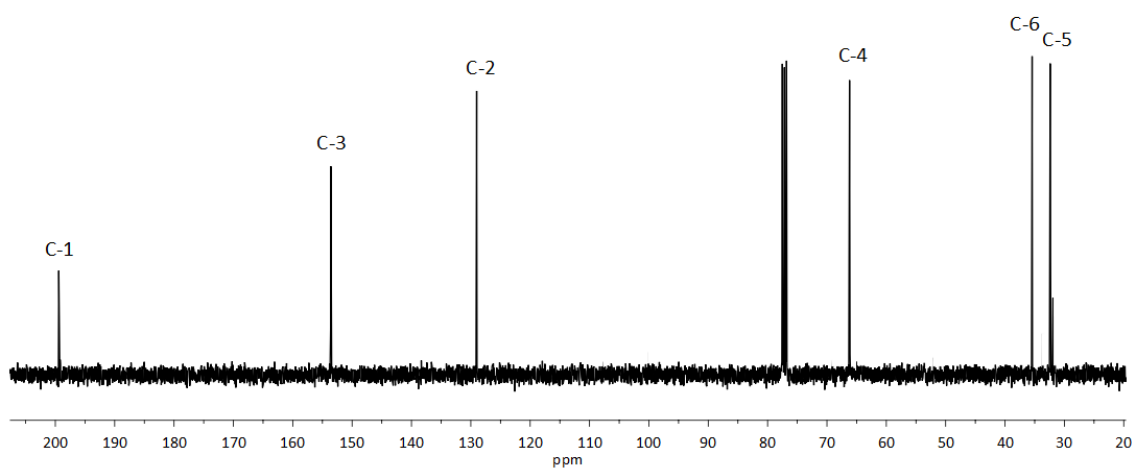

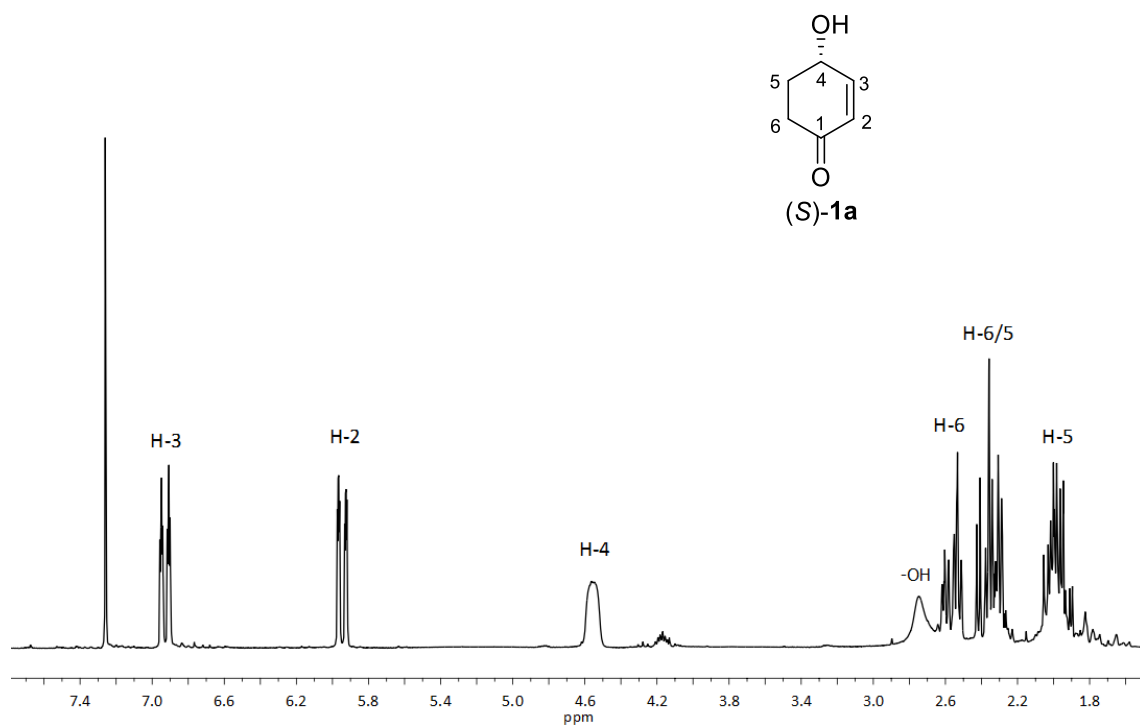

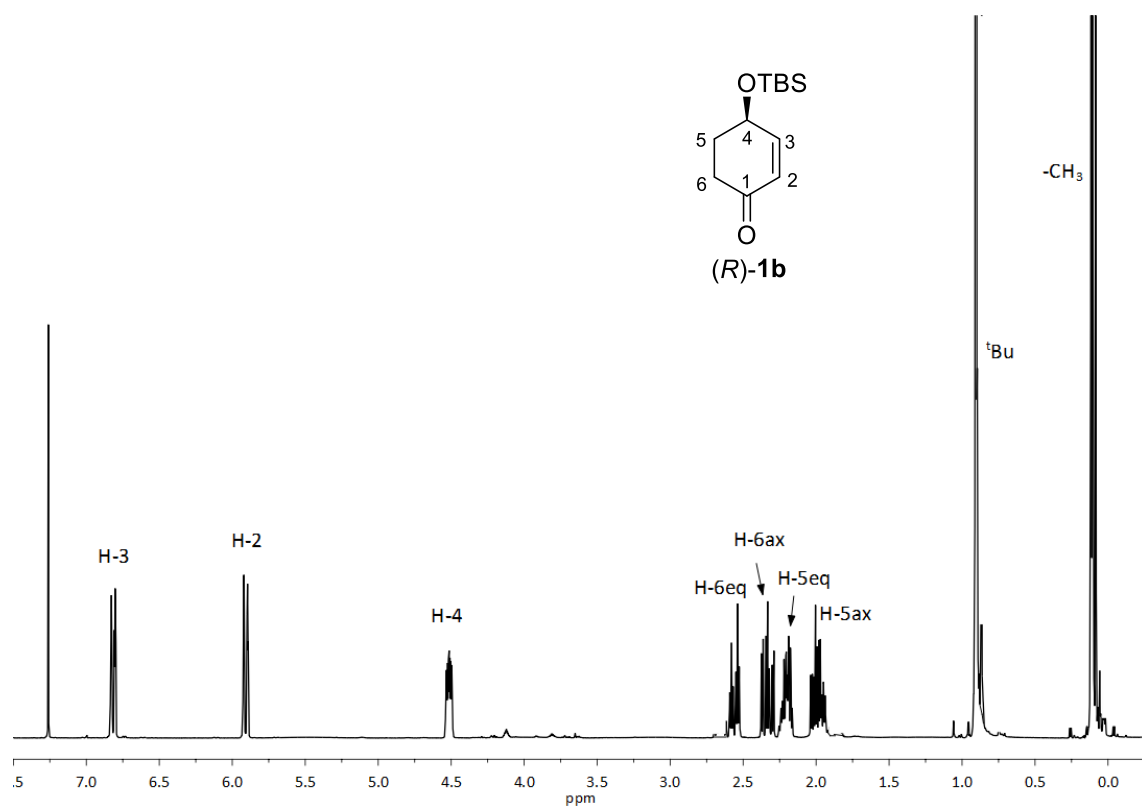

<sup>1</sup>H NMR (400 MHz, CDCl<sub>3</sub>)

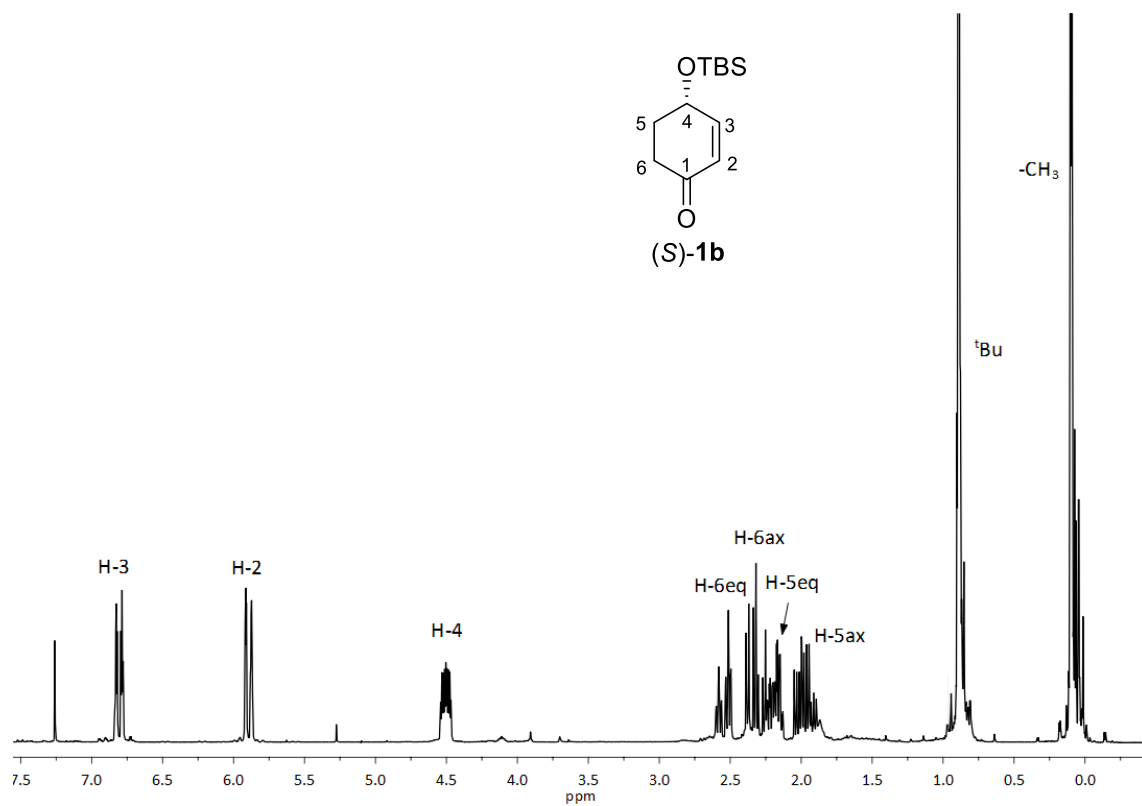

<sup>1</sup>H NMR (400 MHz, CDCl<sub>3</sub>)

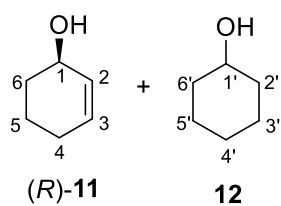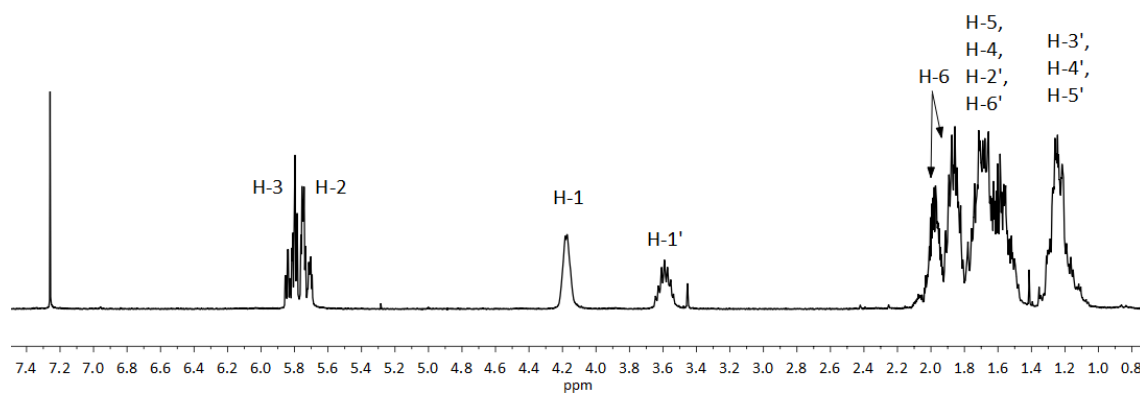

**<sup>1</sup>H NMR (400 MHz, CDCl<sub>3</sub>)**

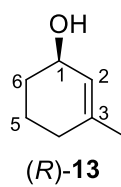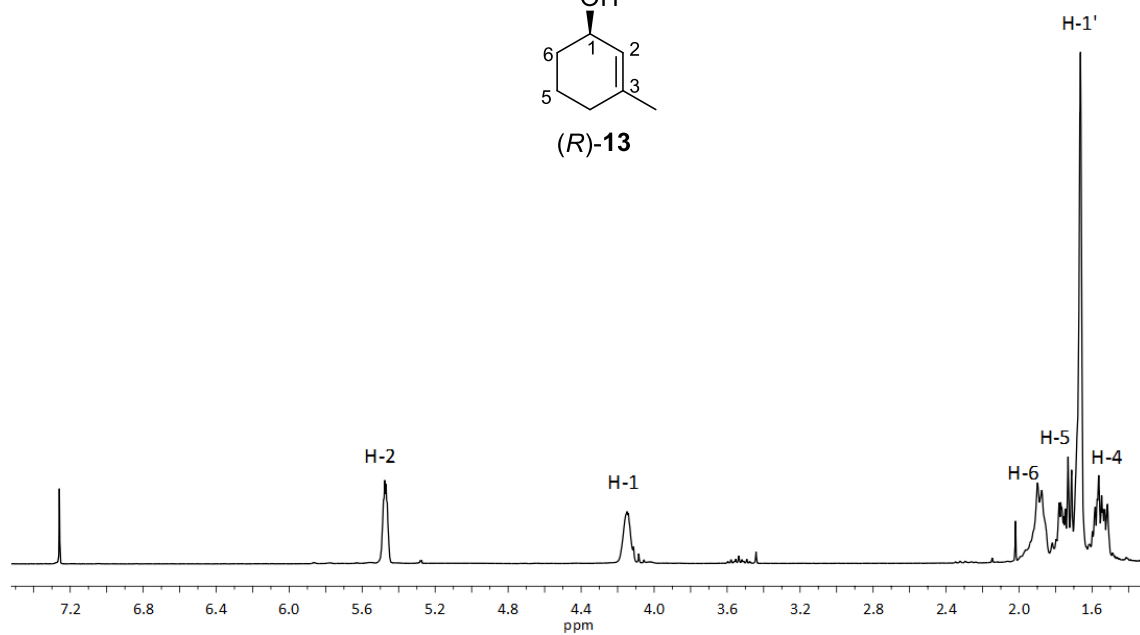

**<sup>1</sup>H NMR (250 MHz, CDCl<sub>3</sub>)**



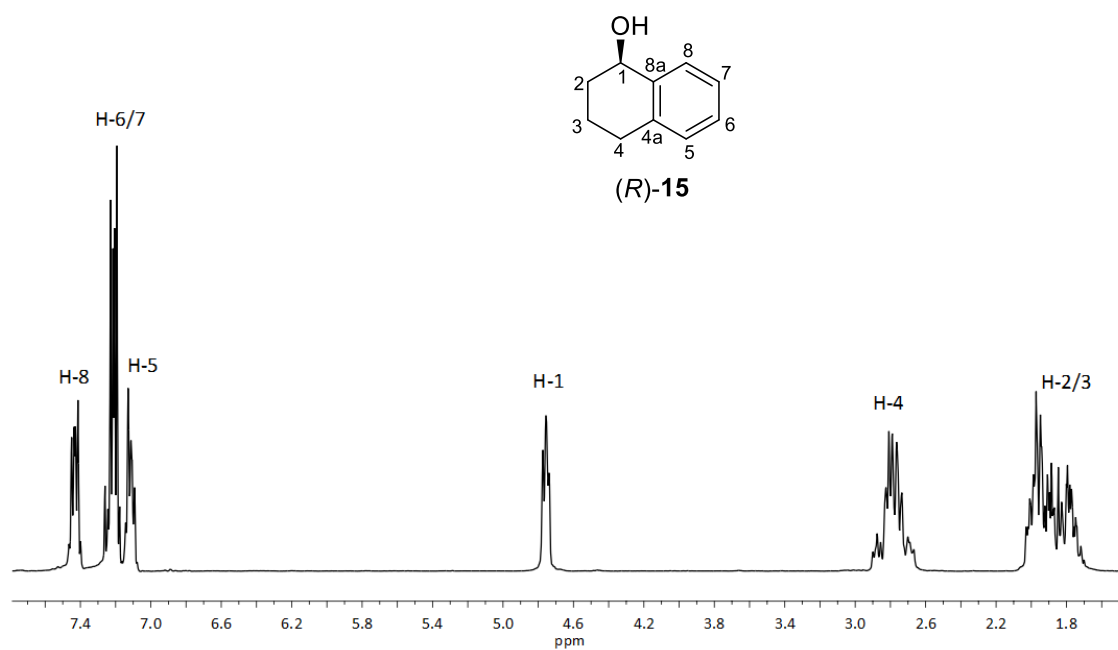

**<sup>1</sup>H NMR (250 MHz, CDCl<sub>3</sub>)**

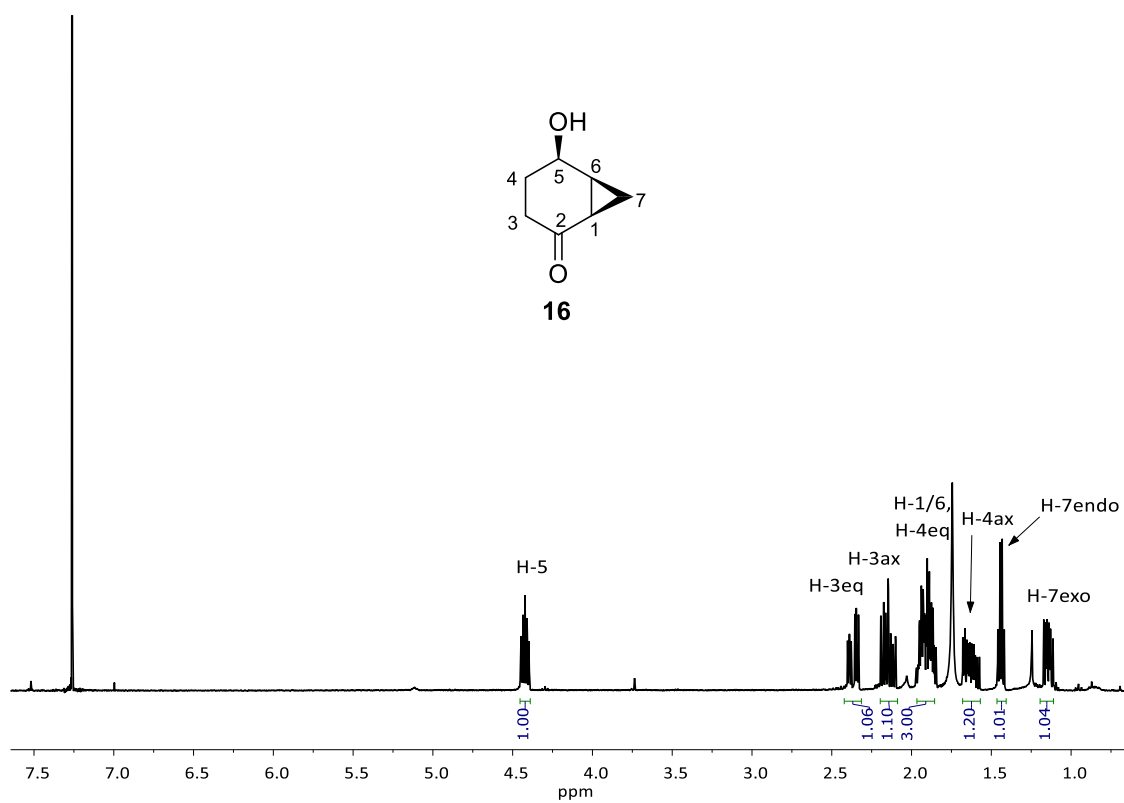

<sup>1</sup>H NMR (400 MHz, CDCl<sub>3</sub>)

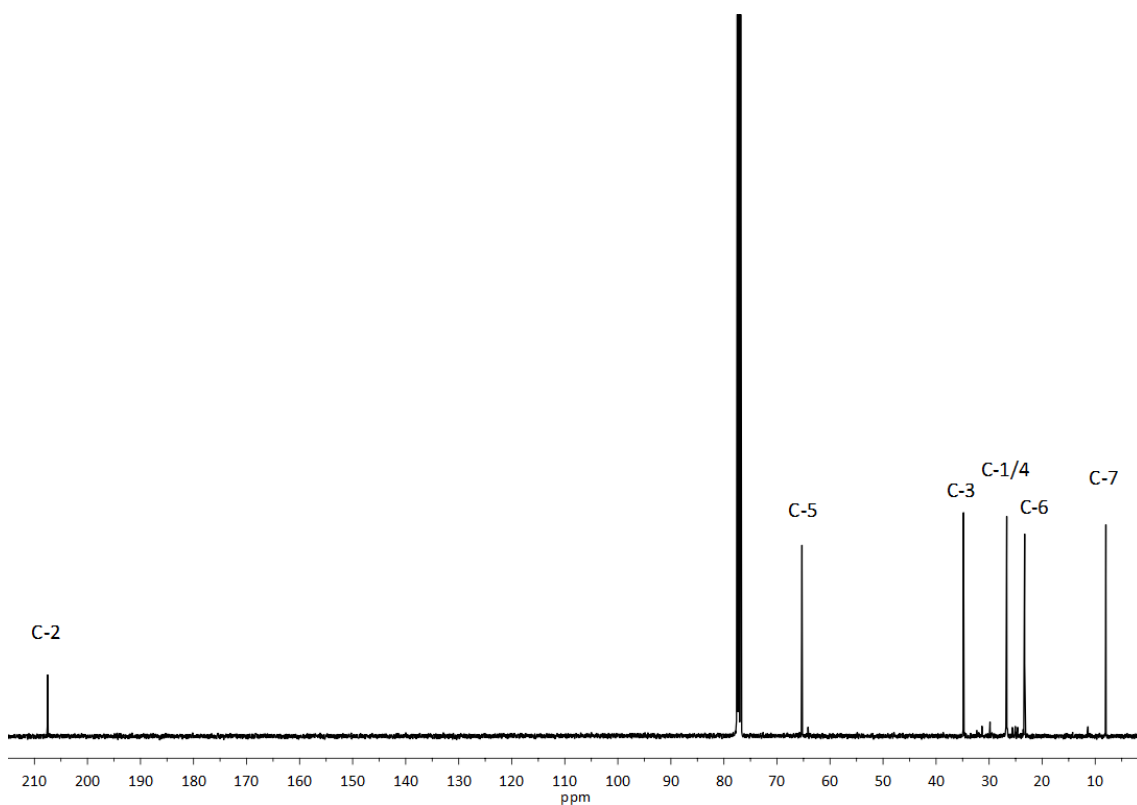

<sup>13</sup>C NMR (100 MHz, CDCl<sub>3</sub>)

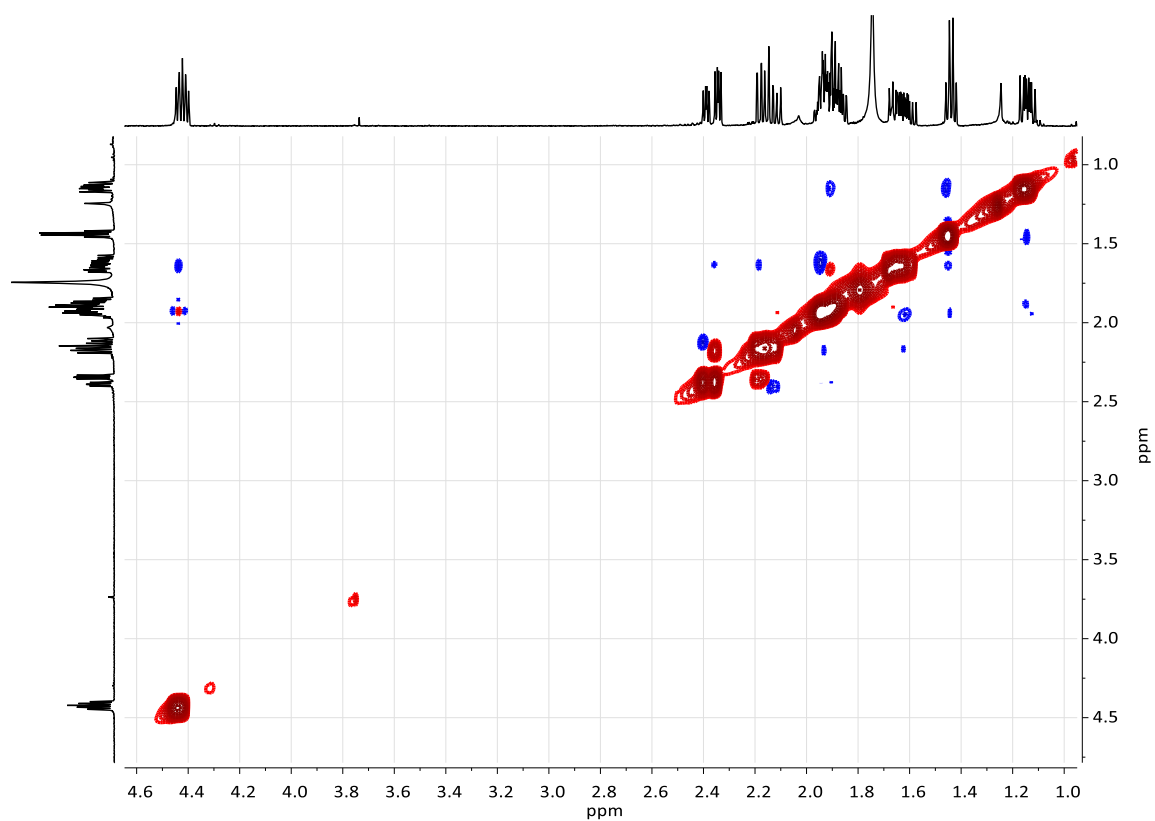

NOESY (400 MHz, CDCl<sub>3</sub>)

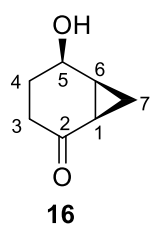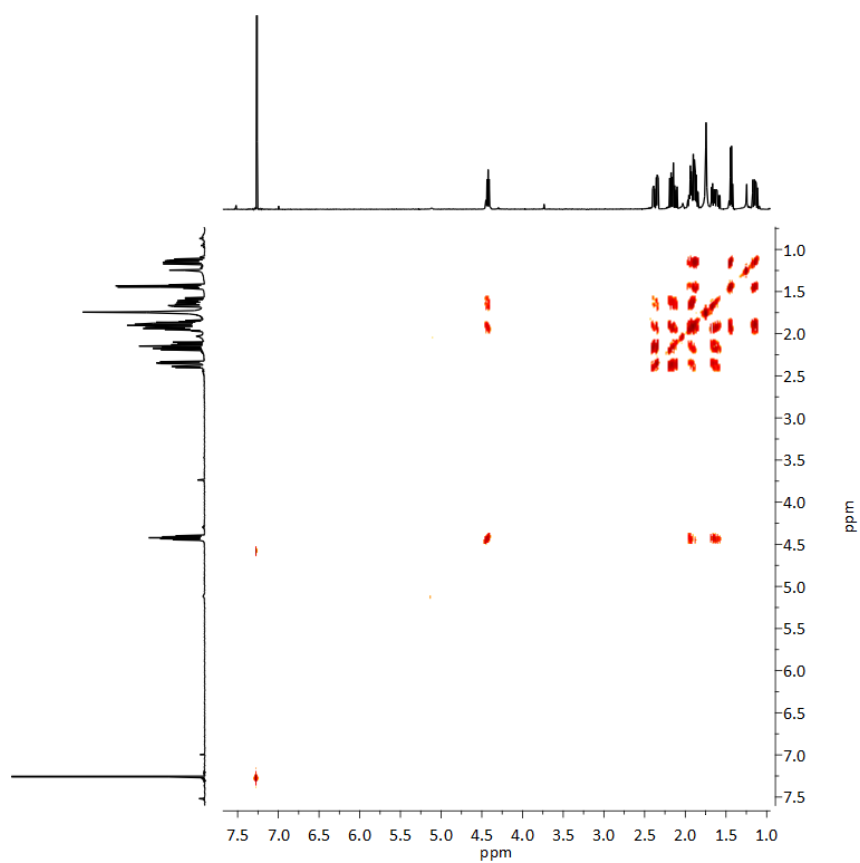

COSY (400 MHz, CDCl<sub>3</sub>)

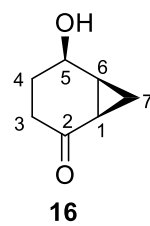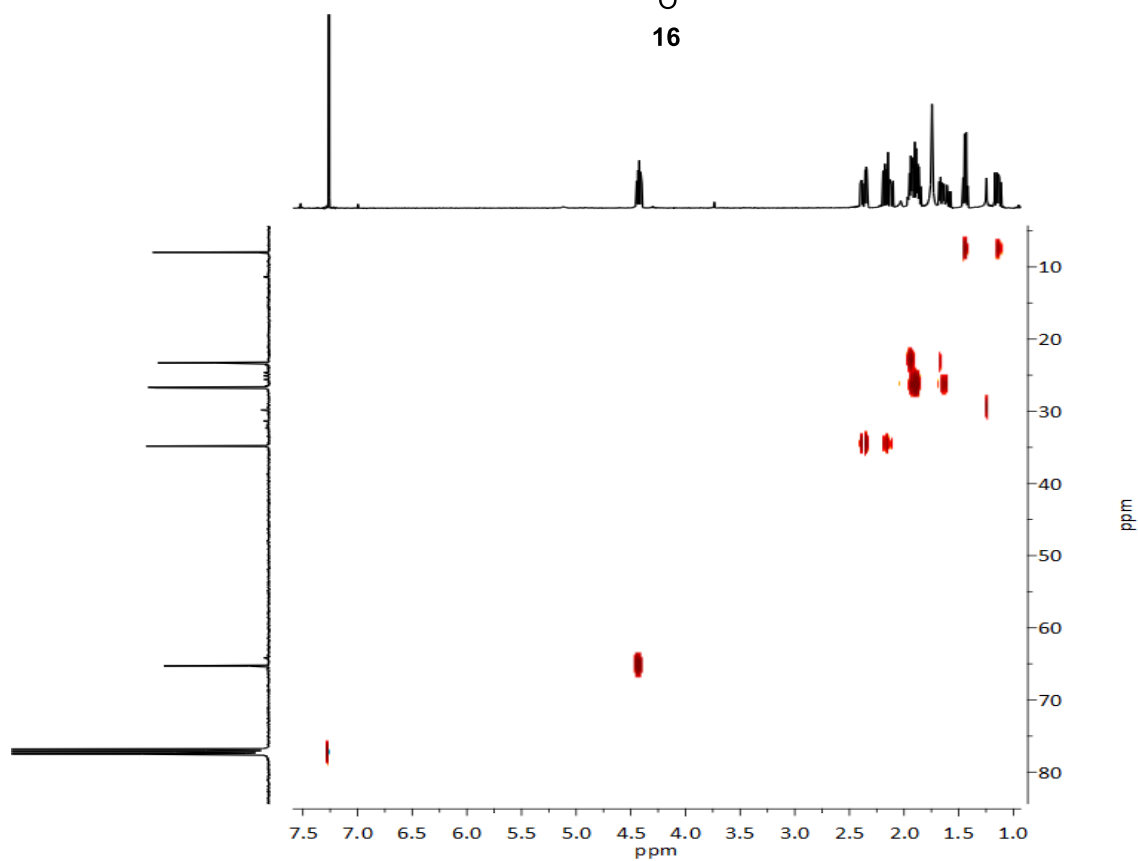

HSQC (400 MHz, CDCl<sub>3</sub>)

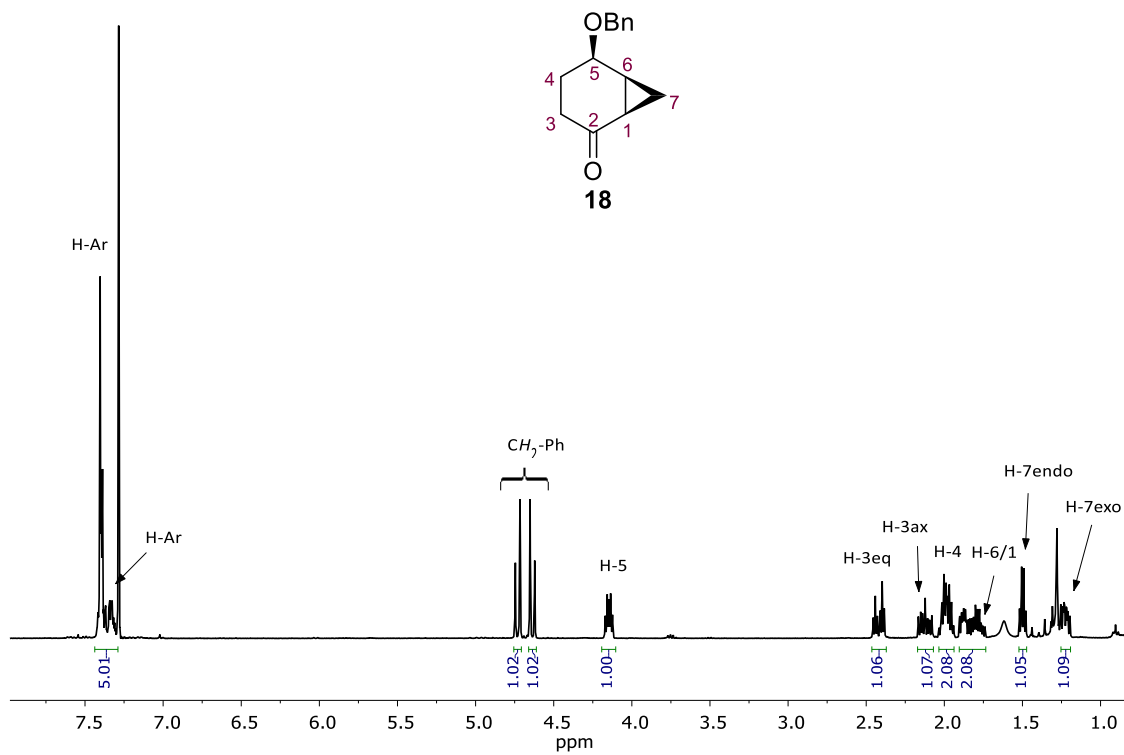

<sup>1</sup>H NMR (400 MHz, CDCl<sub>3</sub>)

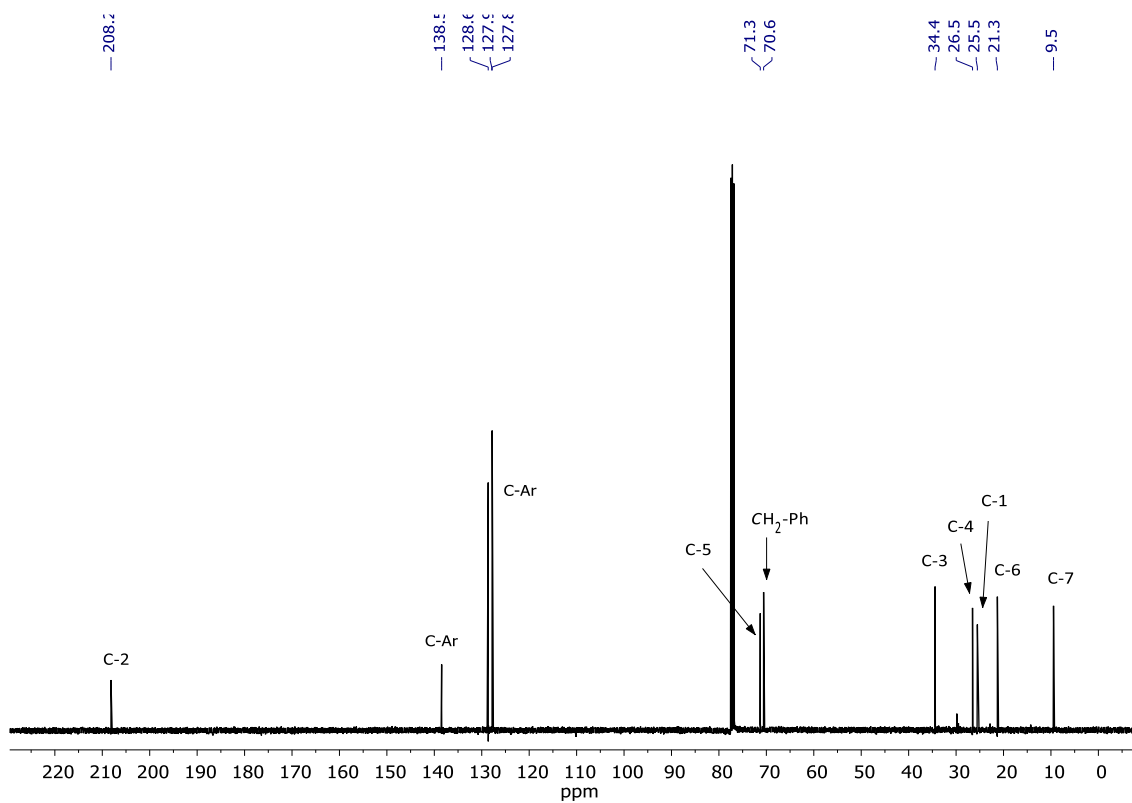

<sup>13</sup>C NMR (100 MHz, CDCl<sub>3</sub>)

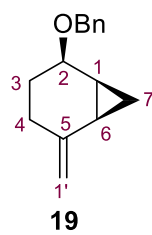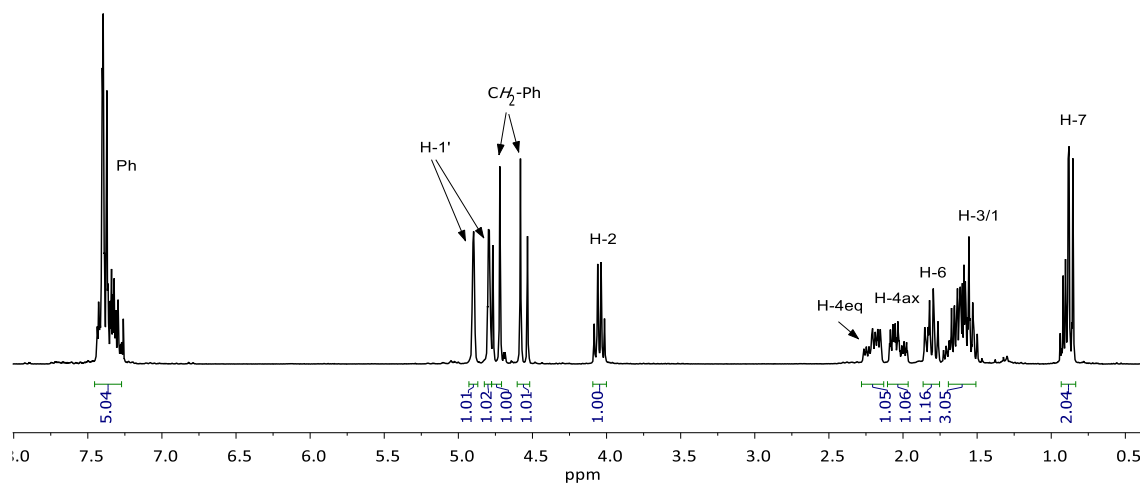

$^1\text{H}$  NMR (400 MHz,  $\text{CDCl}_3$ )

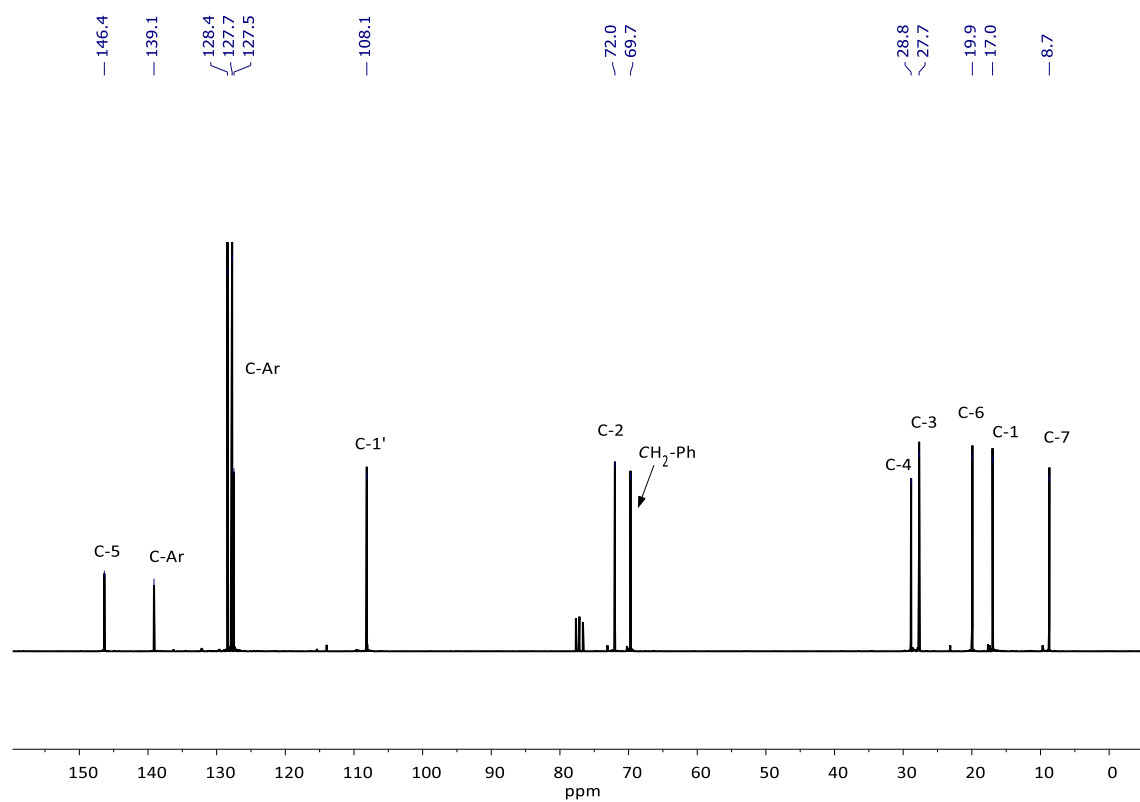

$^{13}\text{C}$  NMR (100 MHz,  $\text{CDCl}_3$ )

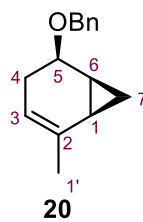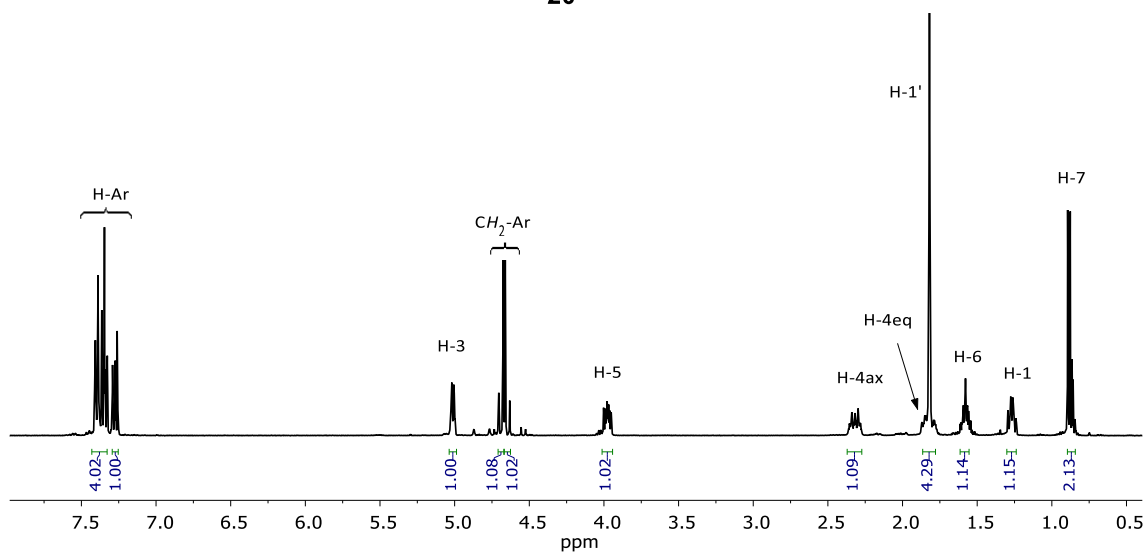

<sup>1</sup>H-NMR (400 MHz, CDCl<sub>3</sub>)

<sup>13</sup>C-NMR (100 MHz, CDCl<sub>3</sub>) chemical shifts (ppm):  
 -139.6, -136.7, 128.8, 128.2, 127.9, -114.3, -73.4, -70.6, 28.0, 23.5, 18.0, 17.8, -10.1

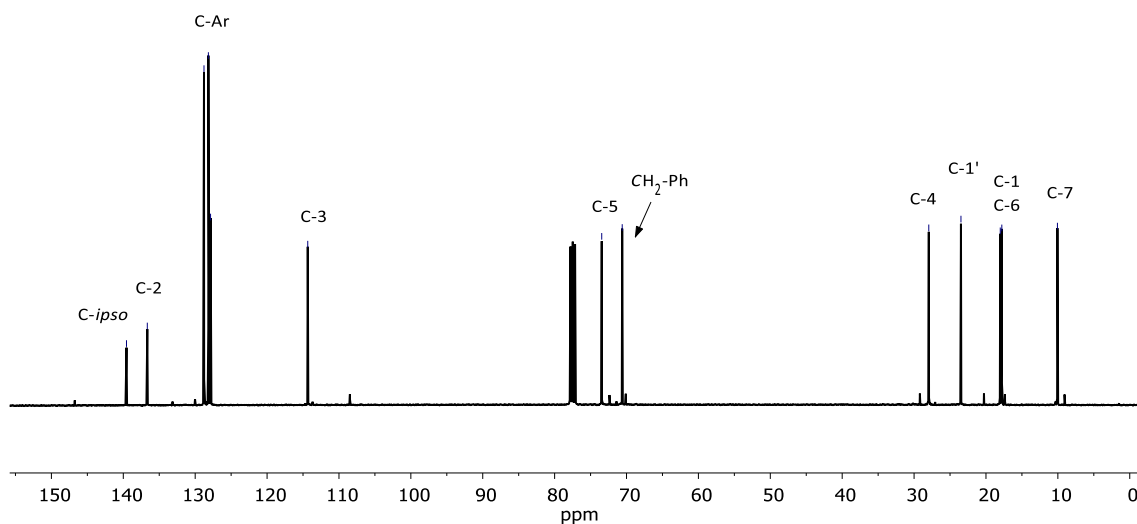

<sup>13</sup>C NMR (100 MHz, CDCl<sub>3</sub>)

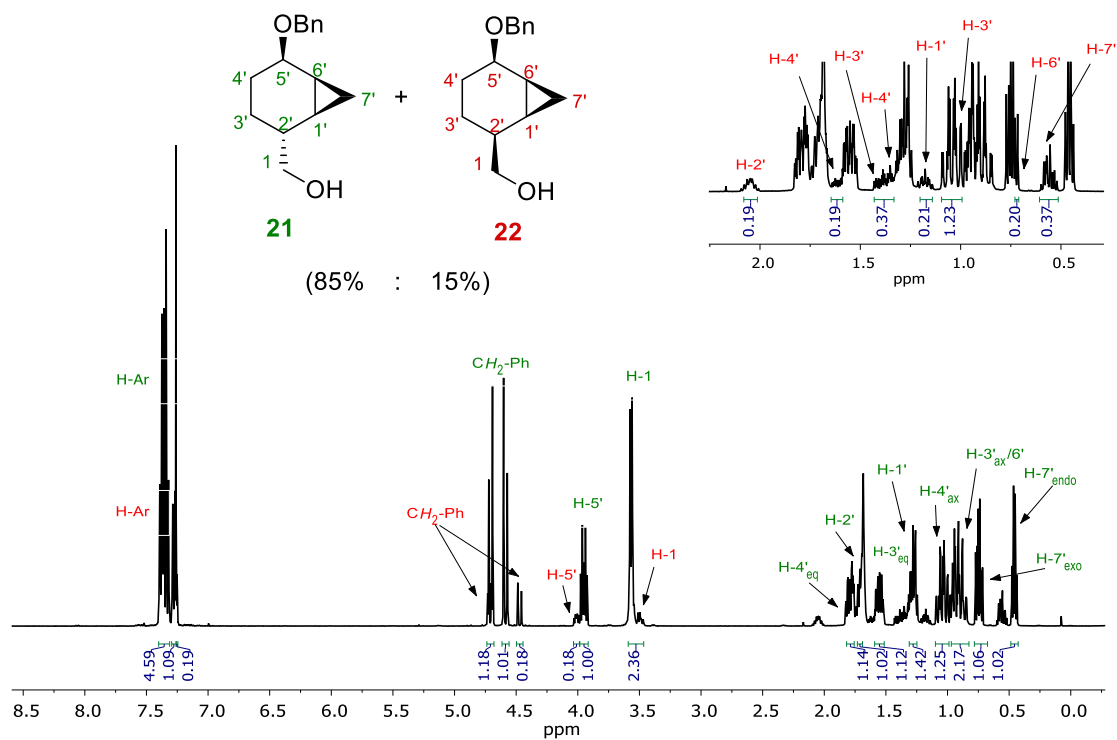

$^1\text{H}$  NMR (400 MHz,  $\text{CDCl}_3$ )

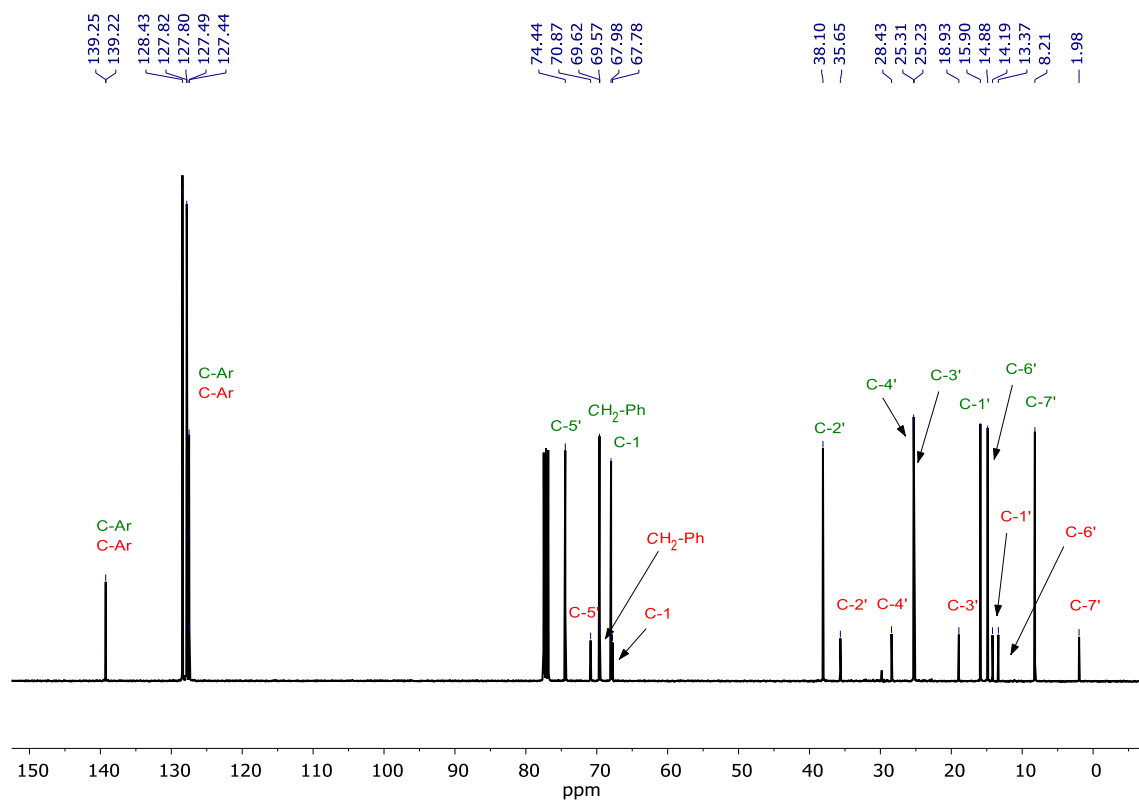

$^{13}\text{C}$  NMR (100 MHz,  $\text{CDCl}_3$ )



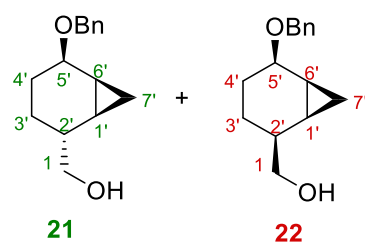

(85% : 15%)

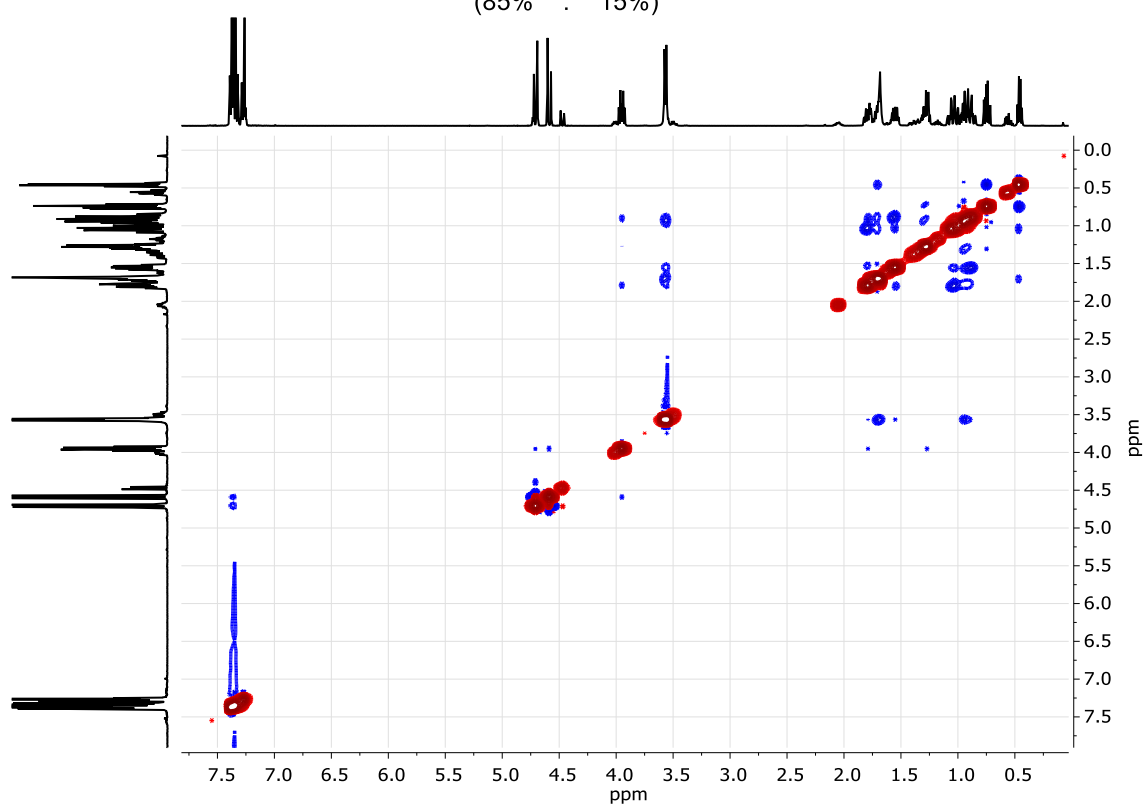

NOESY (400 MHz,  $\text{CDCl}_3$ )

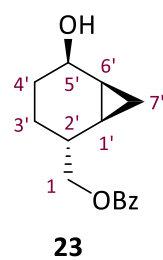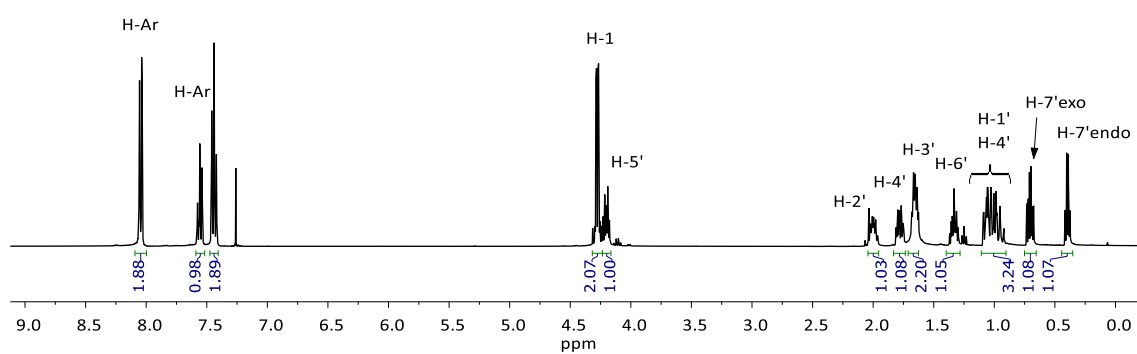

$^1\text{H}$  NMR (400 MHz,  $\text{CDCl}_3$ )

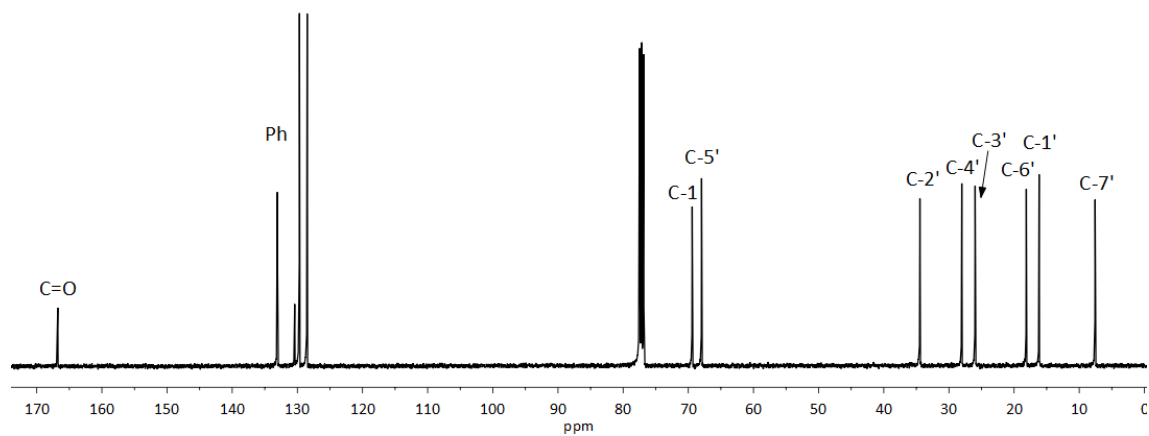

$^{13}\text{C}$  NMR (100 MHz,  $\text{CDCl}_3$ )

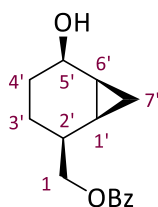

**24**

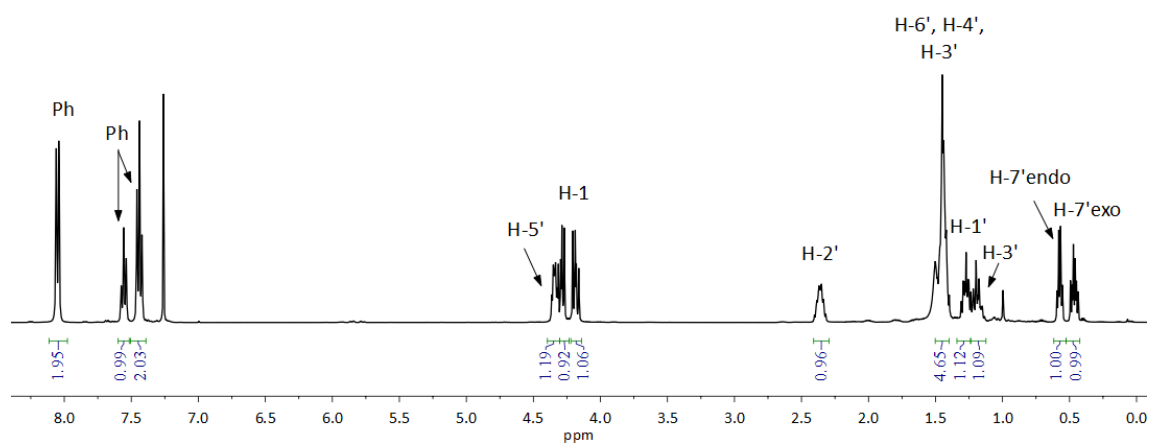

$^1\text{H}$  NMR (400 MHz,  $\text{CDCl}_3$ )

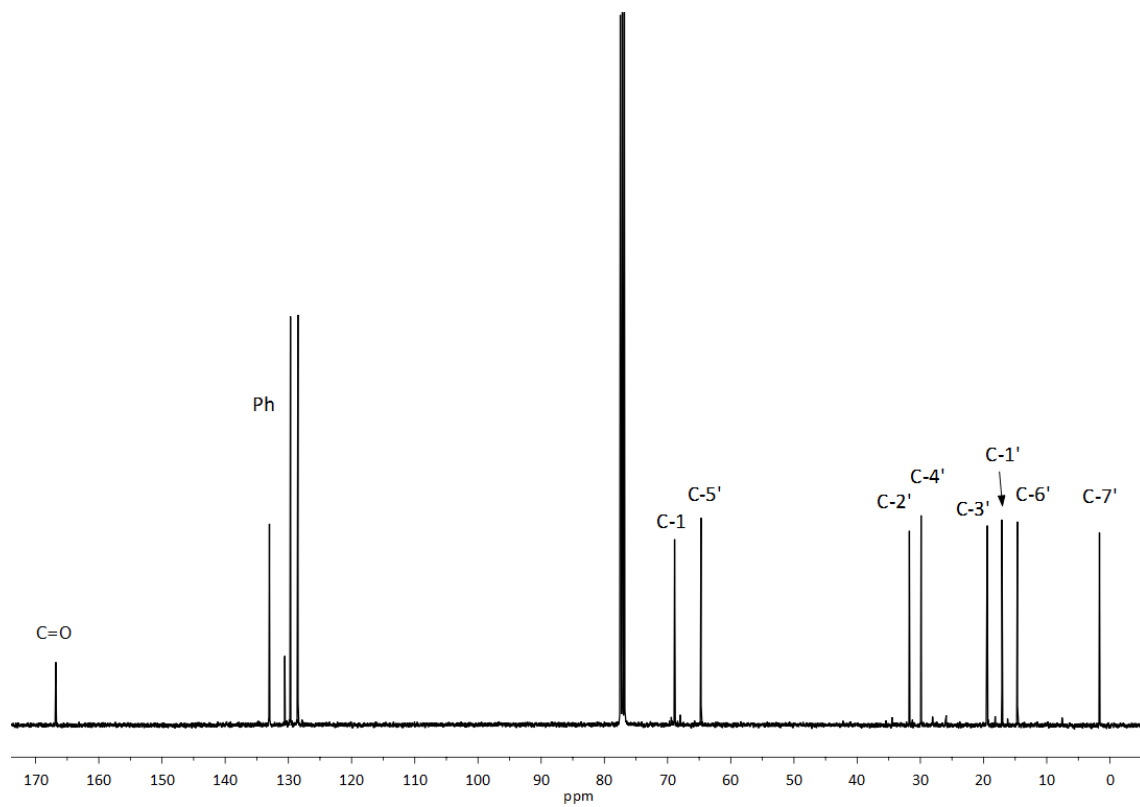

$^{13}\text{C}$  NMR (100 MHz,  $\text{CDCl}_3$ )

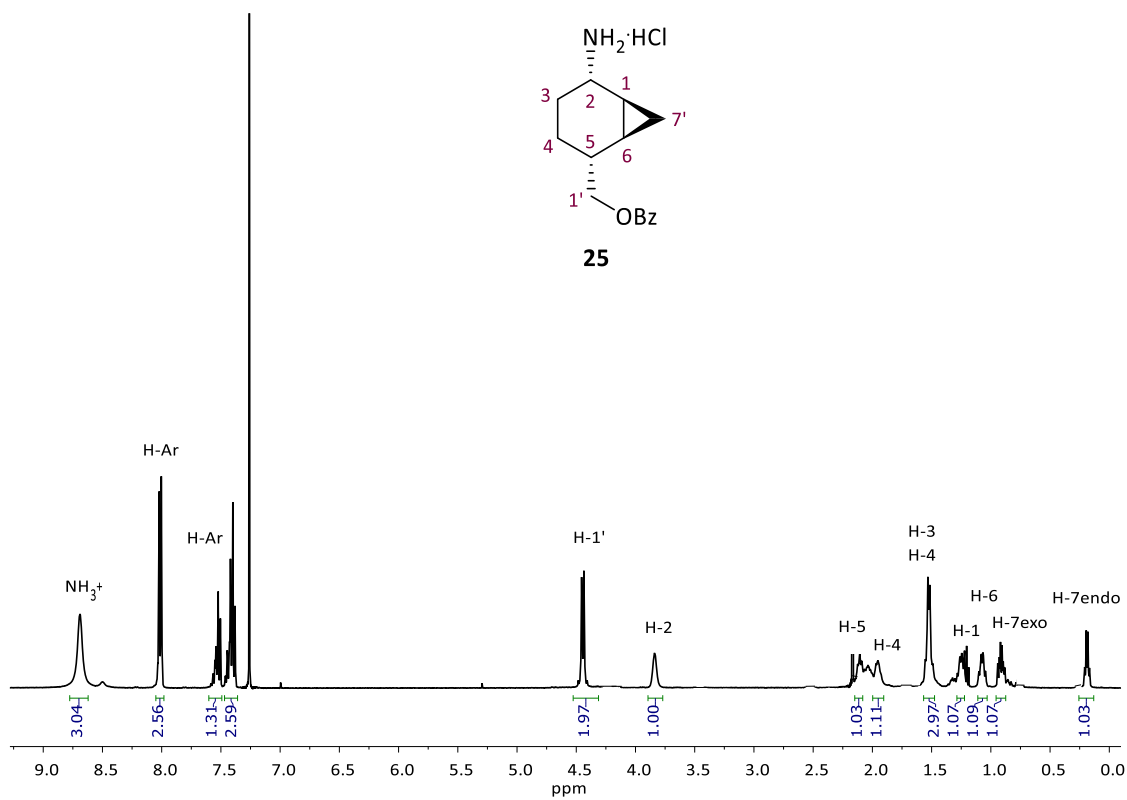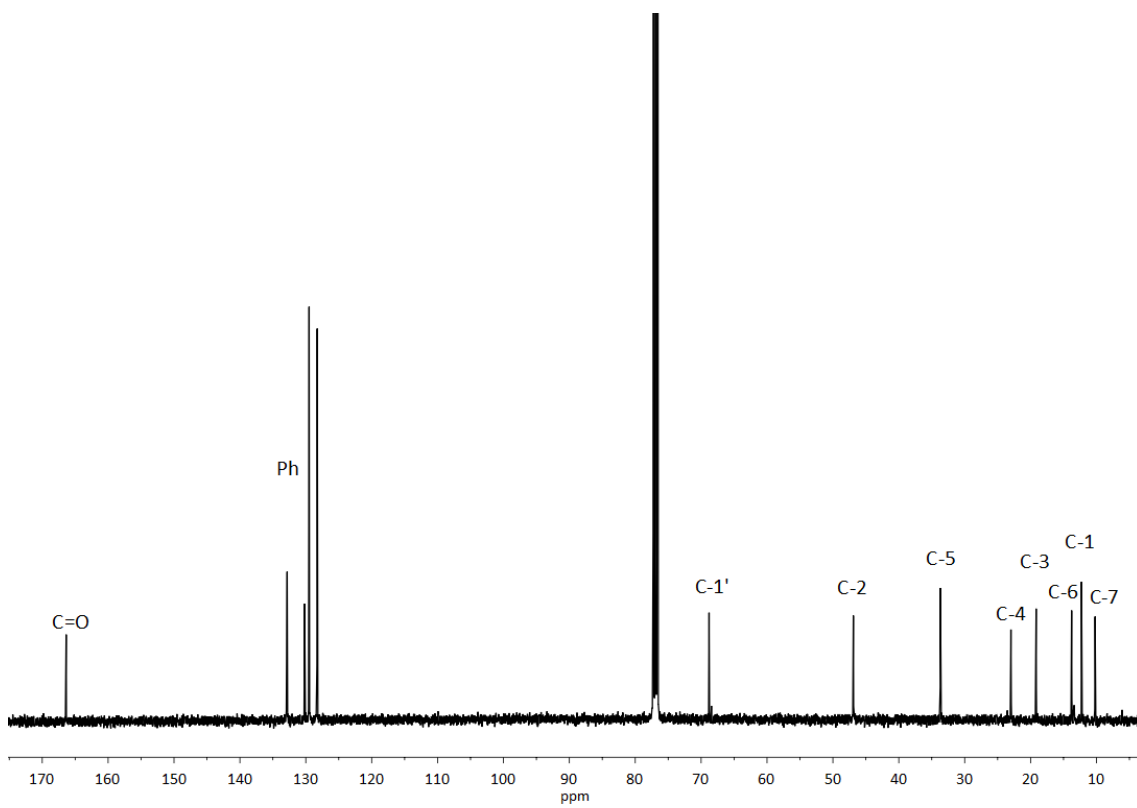

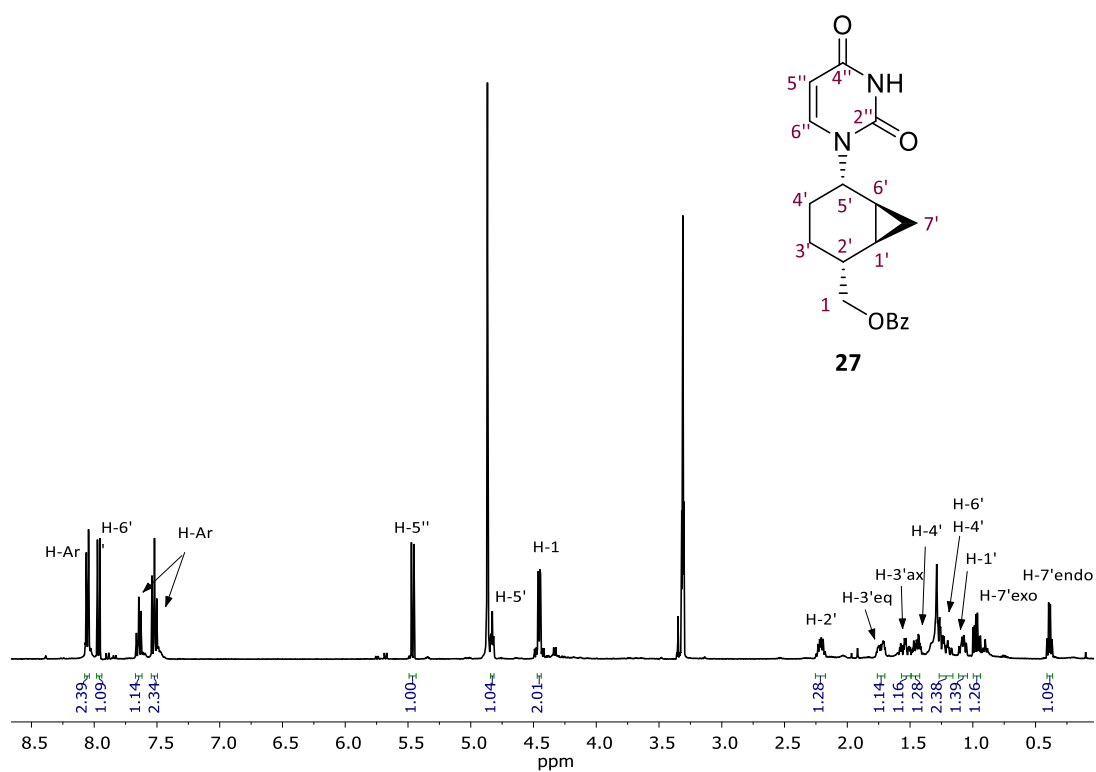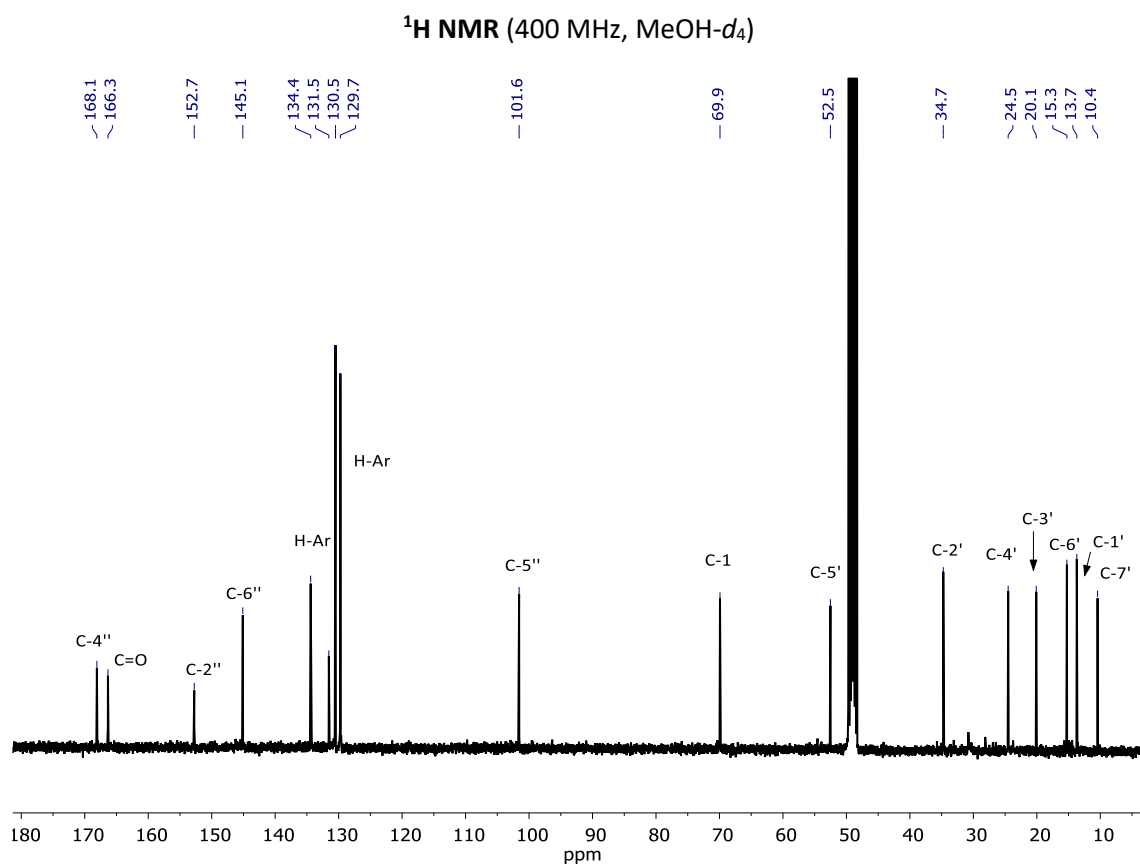

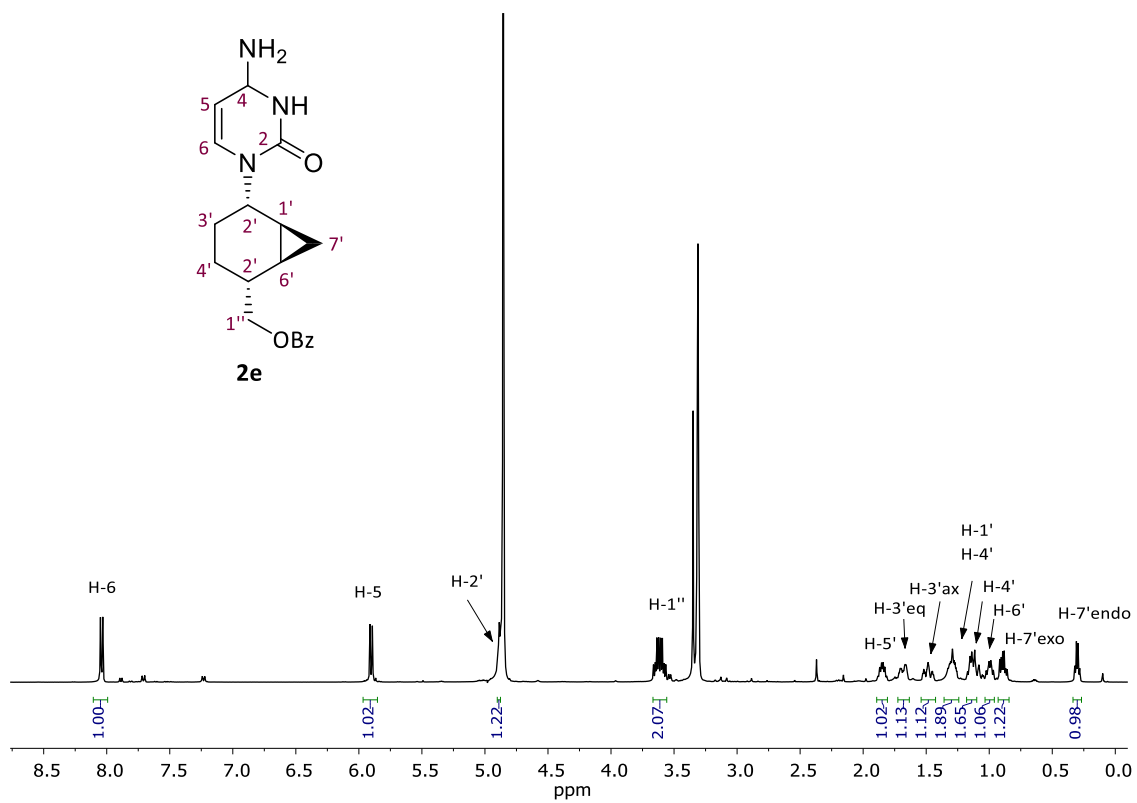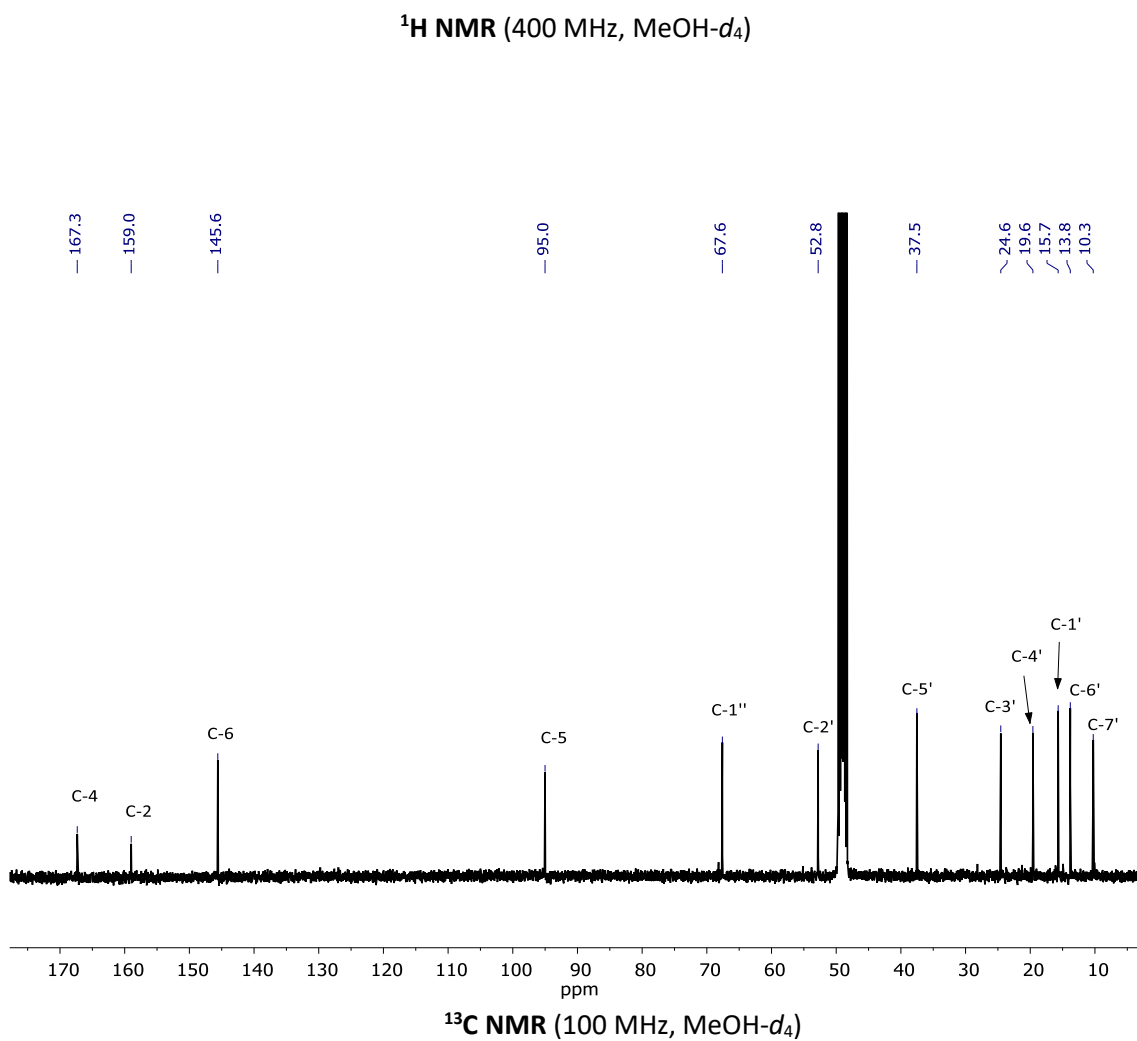

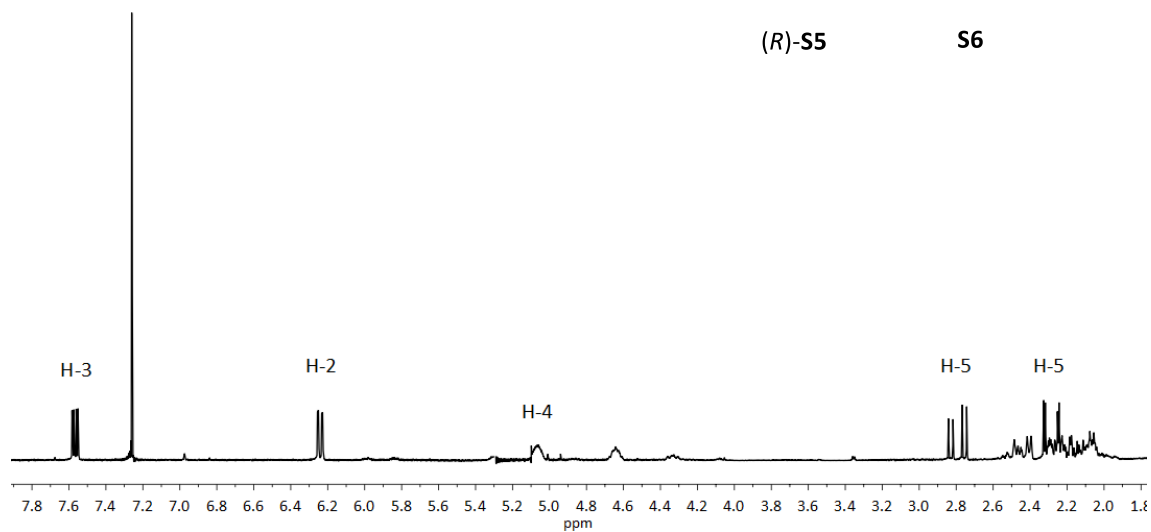

**S2**                      **S7**                      **S8**

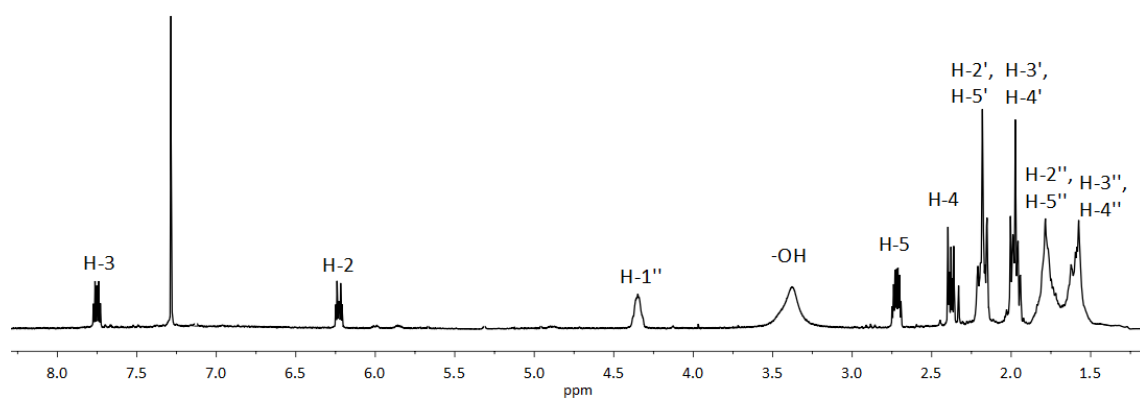<sup>1</sup>H NMR (250 MHz, CDCl<sub>3</sub>)

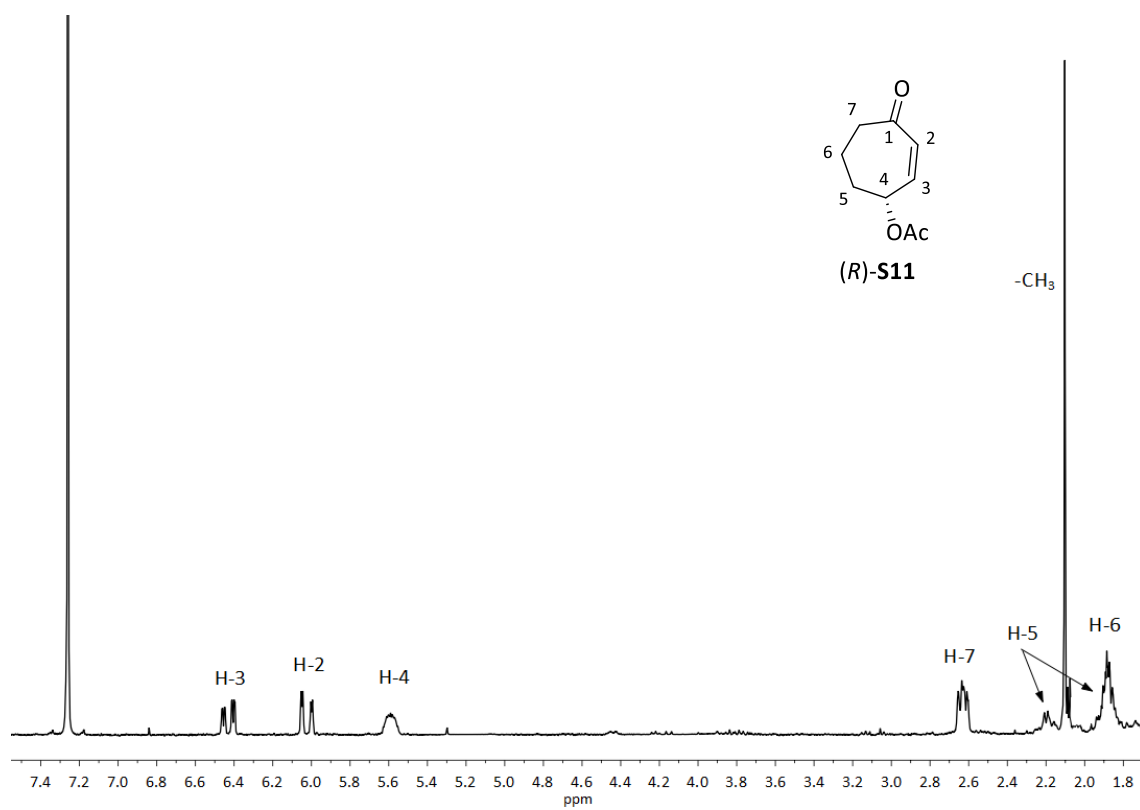

<sup>1</sup>H NMR (250 MHz, CDCl<sub>3</sub>)

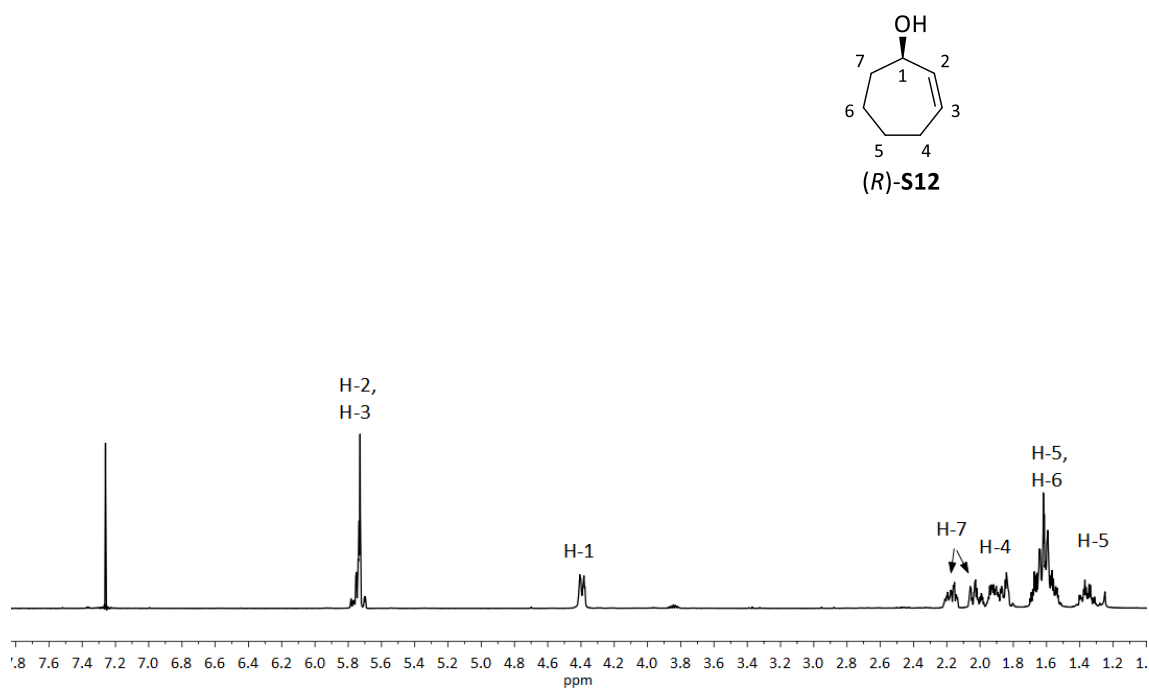

<sup>1</sup>H NMR (400 MHz, CDCl<sub>3</sub>)



## Enantiomeric purity

The enantiomeric excess (ee) was determined by chiral high-pressure liquid chromatography (CHPLC), using a chiral column Daicel IC<sup>i</sup> (0.46 cm x 0.25 cm) and a mixture of hexane:isopropanol 97:3 as eluent in 1ml/min flow rate

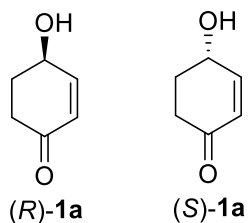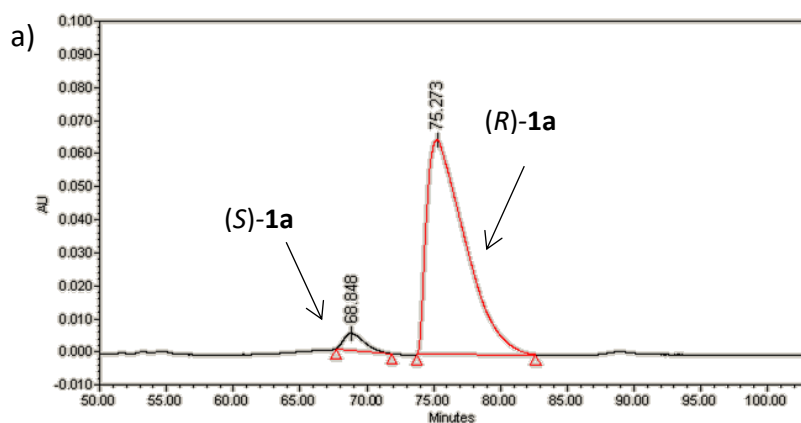

| Compound      | Retention time (min) | Area (μV/sec) | Area (%) |
|---------------|----------------------|---------------|----------|
| <b>(S)-1a</b> | 68.848               | 565378        | 4.14     |
| <b>(R)-1a</b> | 75.273               | 13074831      | 95.86    |

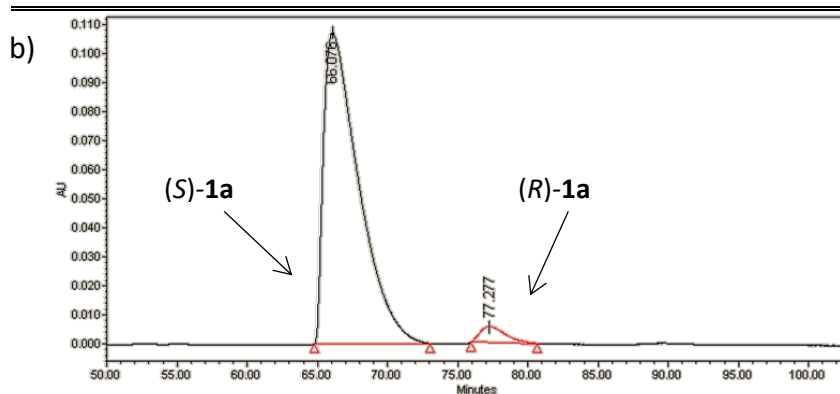

| Compound      | Retention time (min) | Area (μV/sec) | Area (%) |
|---------------|----------------------|---------------|----------|
| <b>(S)-29</b> | 66.076               | 18846502      | 96.22    |
| <b>(R)-29</b> | 77.277               | 739663        | 3.78     |

**Figure S1.** Chiral high-pressure liquid chromatography (CHPLC) of a) (R)-1a and b) (S)-1a.

<sup>i</sup> Chiral column Daicel IC is based on cellulose tris(3,5-dichlorophenyl)carbamate, which is immobilized on to a wide pore silica matrix.

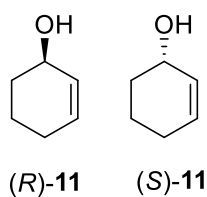

Column: Daicel IC (0.46 cm x 0.25 cm); eluent: hexane-isopropanol (97:3); flow rate: 0.5 mL/min.

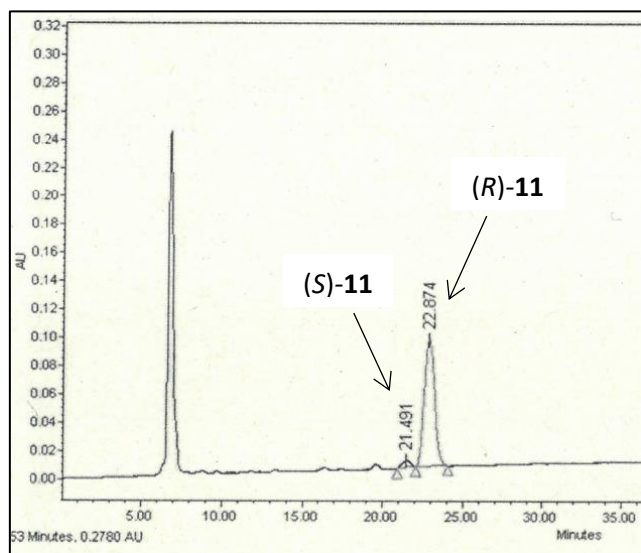

| Compound      | Retention time (min) | Area (%) |
|---------------|----------------------|----------|
| <b>(S)-11</b> | 21.491               | 4.02     |
| <b>(R)-11</b> | 22.874               | 95.98    |

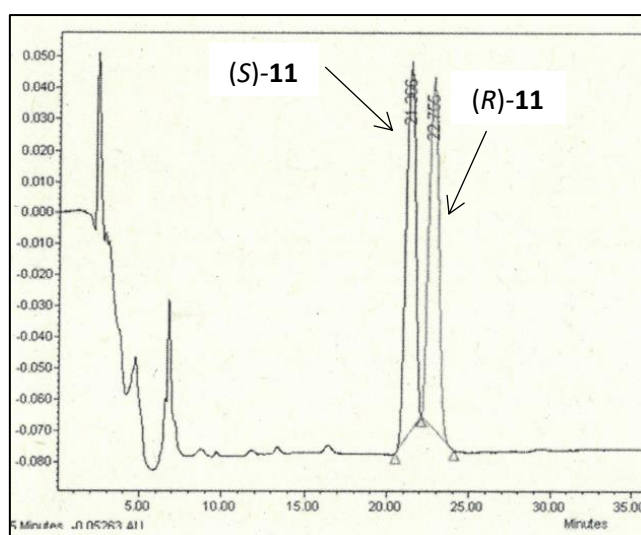

| Compound      | Retention time (min) | Area (%) |
|---------------|----------------------|----------|
| <b>(S)-11</b> | 21.336               | 50.15    |
| <b>(R)-11</b> | 22.755               | 49.85    |

**Figure S2.** Chiral high-pressure liquid chromatography (CHPLC) of a) **(R)-11** and b) *rac*-**11**.

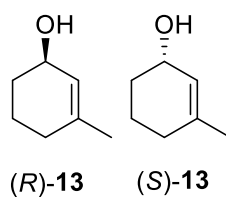

Column: Daicel IC (0.46 cm x 0.25 cm); eluent: hexane-isopropanol (98.5:1.5); flow rate: 0.4 mL/min.

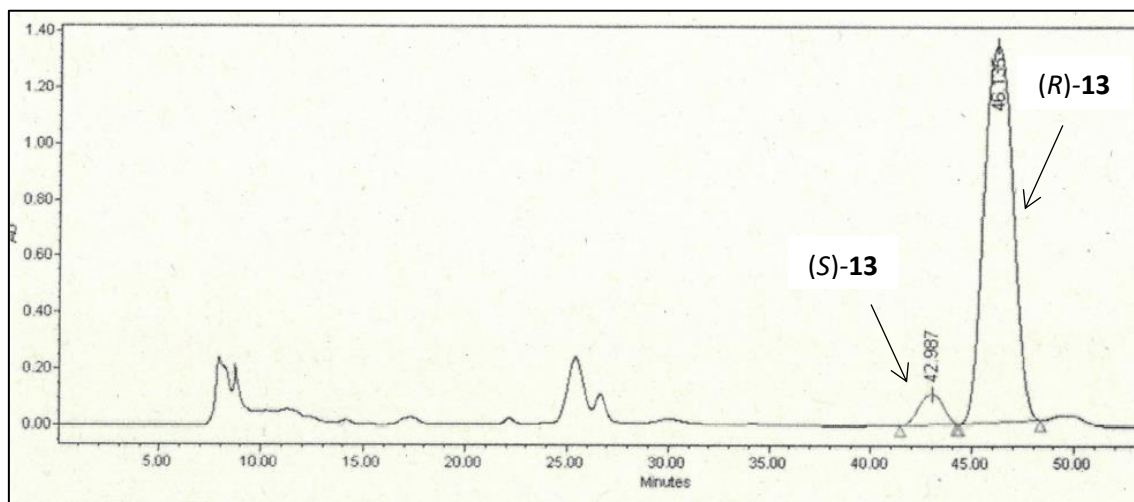

| Compound      | Retention time (min) | Area (%) |
|---------------|----------------------|----------|
| <b>(S)-13</b> | 42.987               | 6.17     |
| <b>(R)-13</b> | 46.135               | 93.83    |

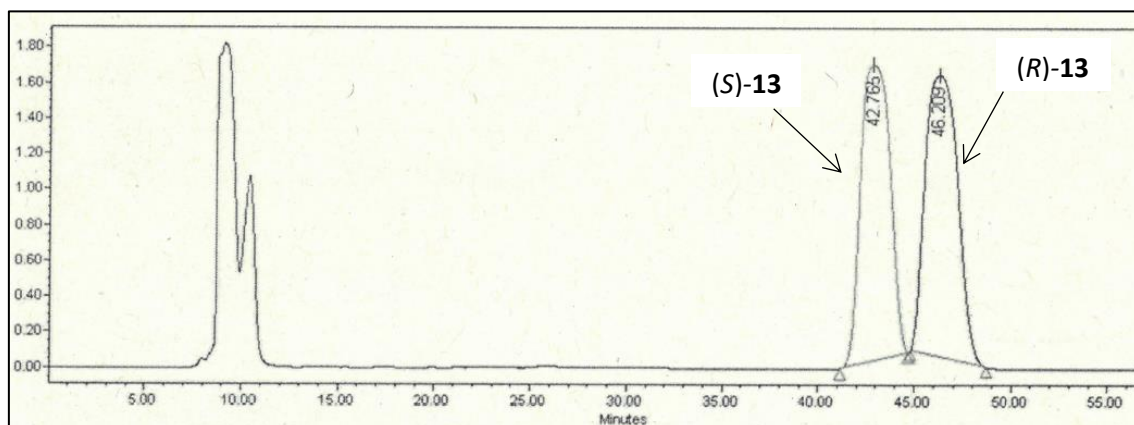

| Compound      | Retention time (min) | Area (%) |
|---------------|----------------------|----------|
| <b>(S)-13</b> | 42.765               | 48.89    |
| <b>(R)-13</b> | 46.209               | 51.11    |

**Figure S3.** Chiral high-pressure liquid chromatography (CHPLC) of a) **(R)-13** and b) *rac*-**13**.

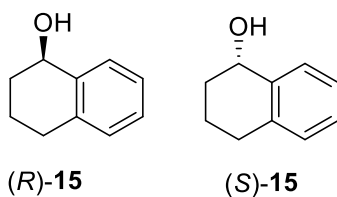

Column: Daicel Chiralpack OD-H<sup>ii</sup> (0.46 cm x 0.25 cm); eluent: hexane-isopropanol (96:4); flow rate: 0.5 mL/min.

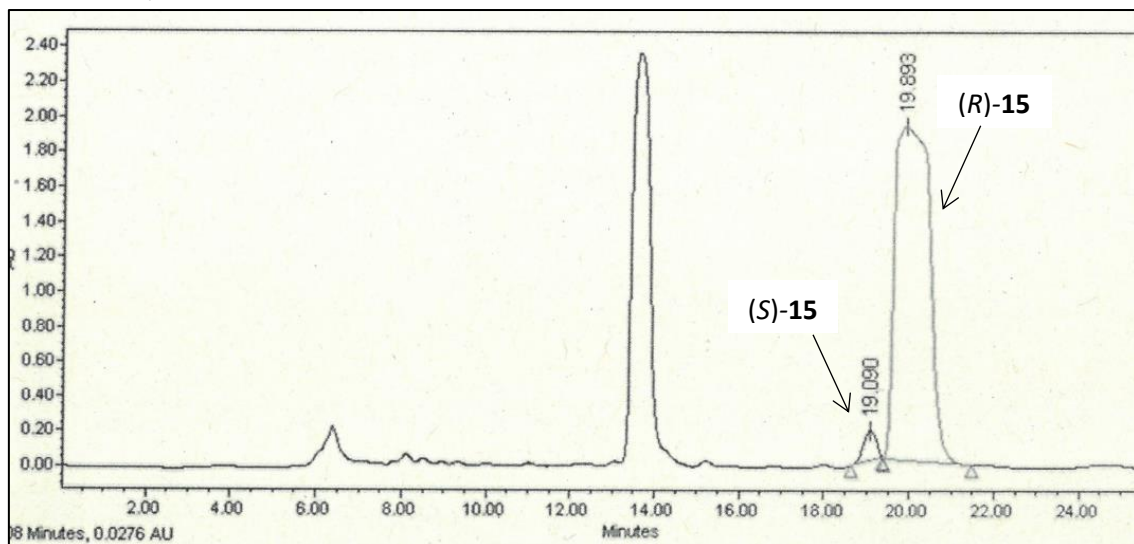

| Compound | Retention time (min) | Area (%) |
|----------|----------------------|----------|
| (S)-15   | 19.090               | 3.17     |
| (R)-15   | 19.893               | 96.83    |

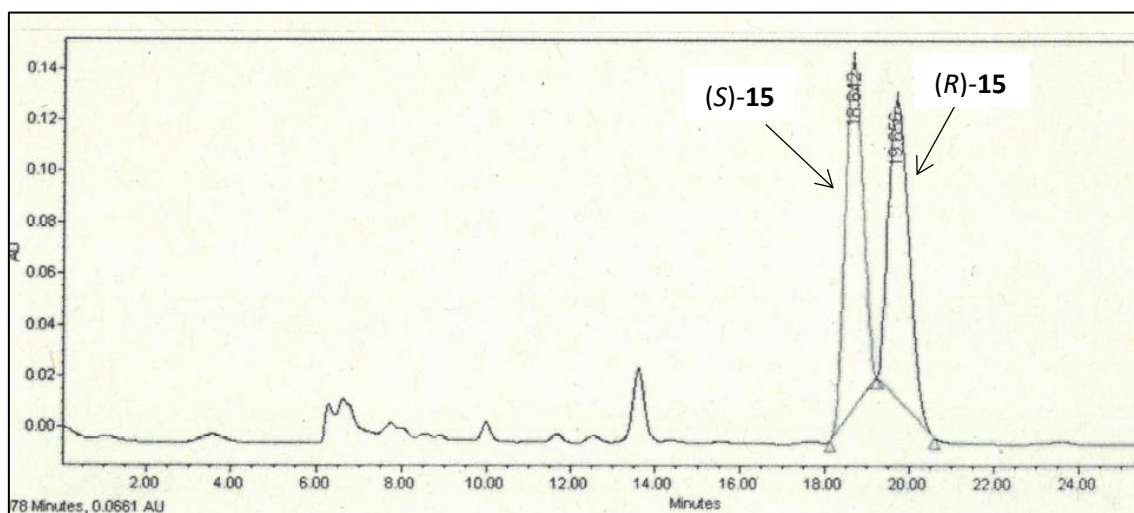

| Compound | Retention time (min) | Area (%) |
|----------|----------------------|----------|
| (S)-15   | 18.642               | 50.26    |
| (R)-15   | 19.656               | 49.71    |

**Figure S4.** Chiral high-pressure liquid chromatography (CHPLC) of a) (R)-15 and b) *rac*-15.

<sup>ii</sup> Chiral column Daicel OD-H is based on cellulose tris(3,5-dimethylphenyl)carbamate, which is coated on 5 µm silica-gel.

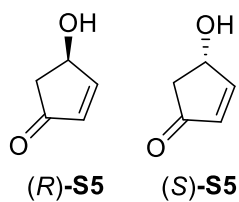

Column: Daicel IC (0.46 cm x 0.25 cm); eluent: hexane-isopropanol (97:3); flow rate: 1.0 mL/min.

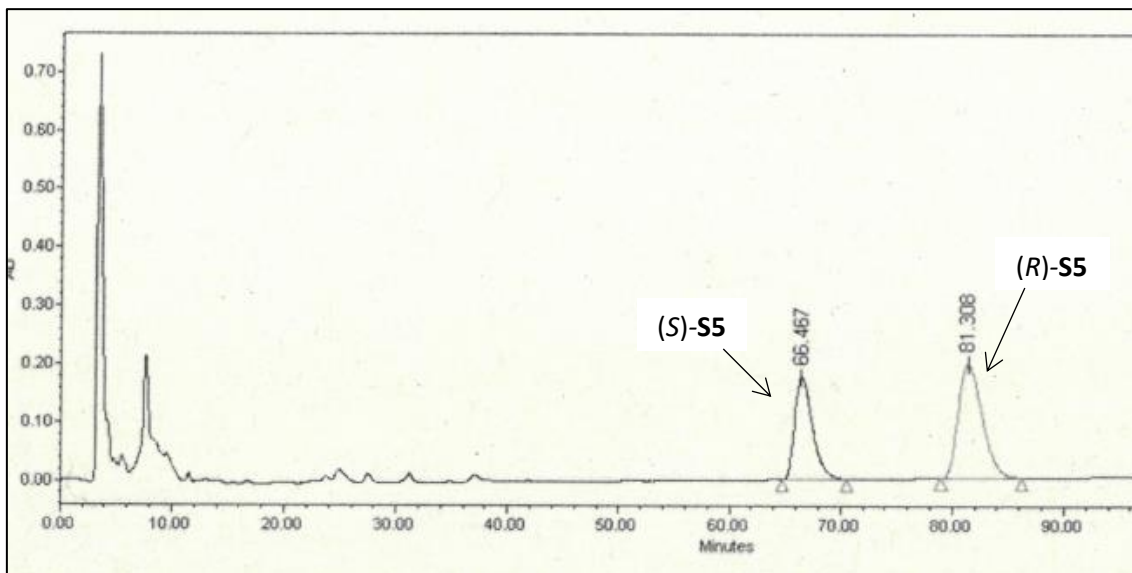

| Compound | Retention time (min) | Area (%) |
|----------|----------------------|----------|
| (S)-S5   | 66.467               | 39.94    |
| (R)-S5   | 81.308               | 60.06    |

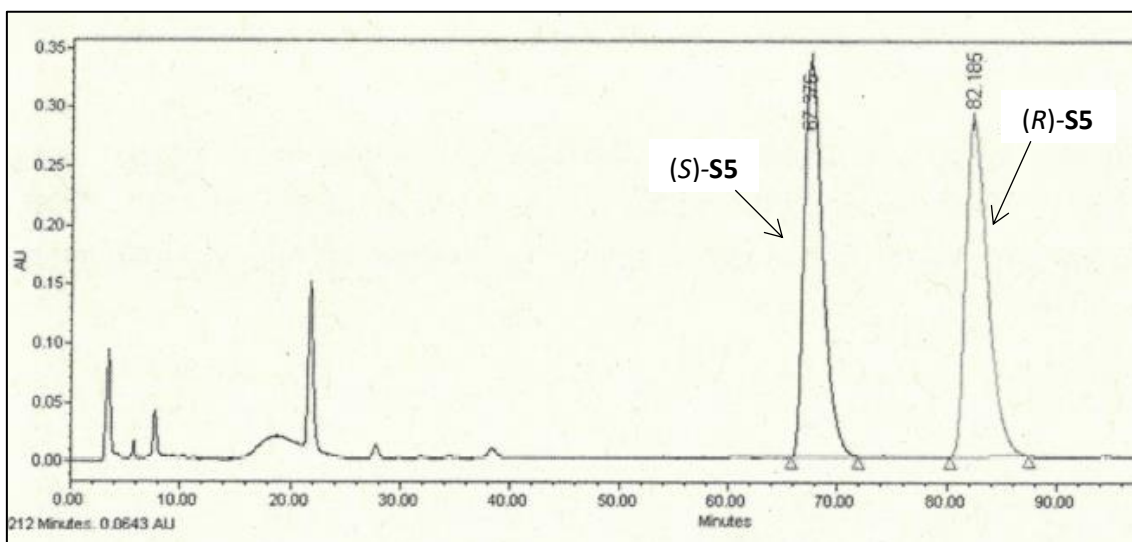

| Compound | Retention time (min) | Area (%) |
|----------|----------------------|----------|
| (S)-S5   | 67.376               | 49.96    |
| (R)-S5   | 82.185               | 50.04    |

**Figure S5.** Chiral high-pressure liquid chromatography (CHPLC) of a) (R)-S5 and b) *rac*-S5.

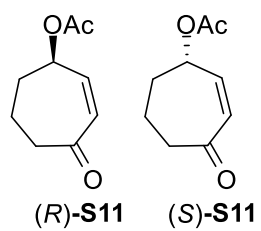

Column: Daicel IC (0.46 cm x 0.25 cm); eluent: hexane-isopropanol (95.8:4.2); flow rate: 1.0 mL/min.

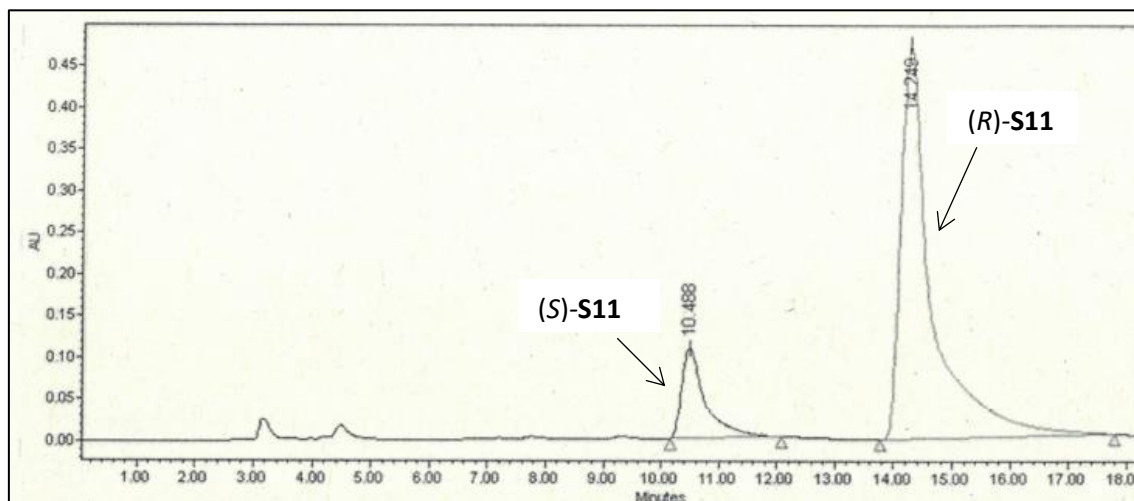

| Compound | Retention time (min) | Area (%) |
|----------|----------------------|----------|
| (S)-S11  | 10.488               | 14.91    |
| (R)-S11  | 14.249               | 85.09    |

**Figure S6.** Chiral high-pressure liquid chromatography (CHPLC) of a) (*R*)-S9.

Chiral high-pressure liquid chromatography (CHPLC) of *rac*-S11 Ref. [1].

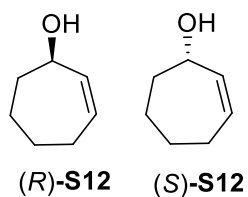

Column: Daicel IC (0.46 cm x 0.25 cm); eluent: hexane-isopropanol (98.5:1.5); flow rate: 0.4 mL/min.

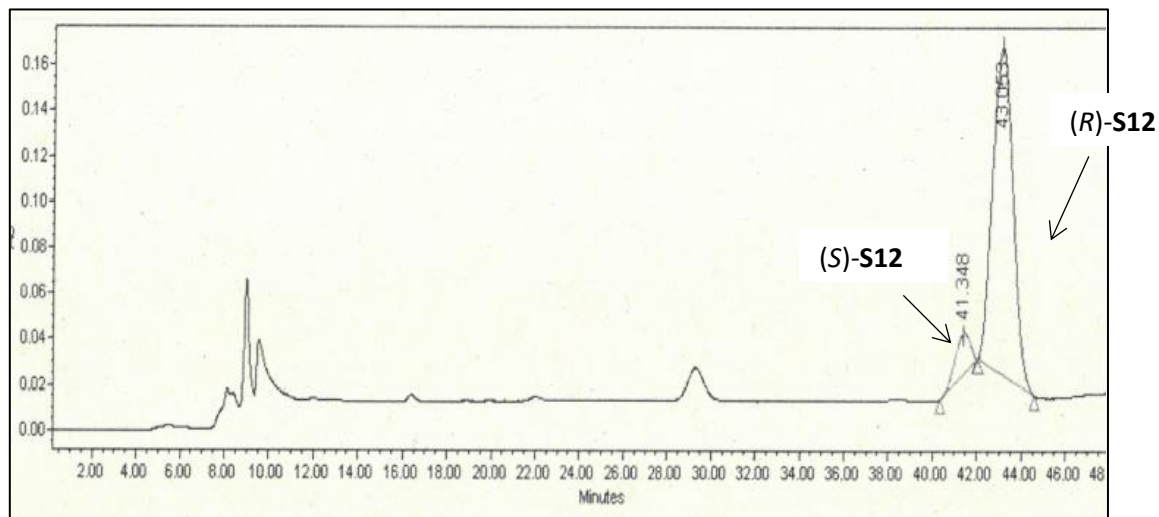

| Compound | Retention time (min) | Area (%) |
|----------|----------------------|----------|
| (S)-S12  | 41.348               | 8.41     |
| (R)-S12  | 43.053               | 91.59    |

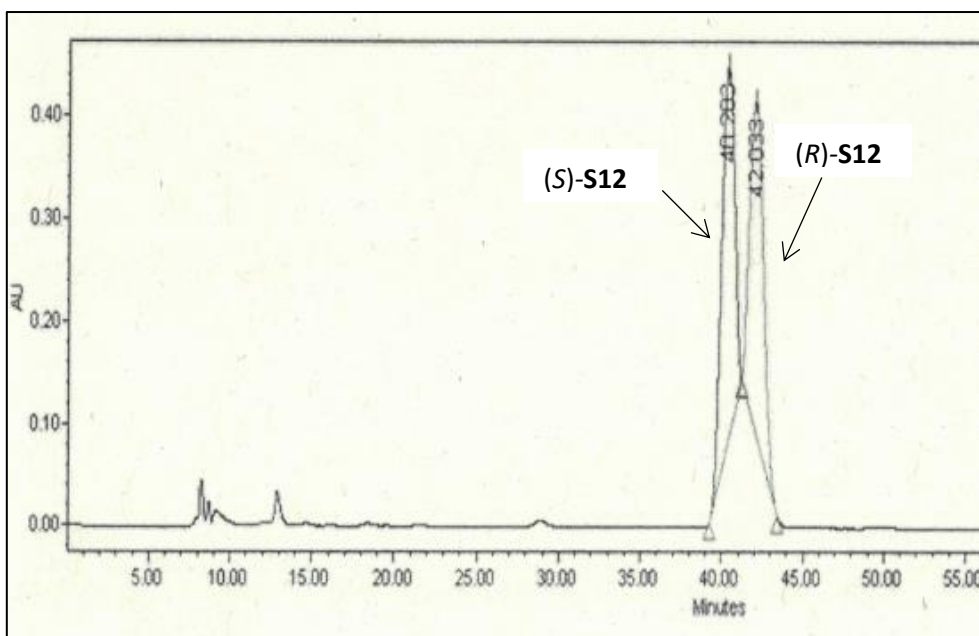

| Compound | Retention time (min) | Area (%) |
|----------|----------------------|----------|
| (S)-S12  | 40.283               | 50.77    |
| (R)-S12  | 42.033               | 49.23    |

**Figure S7.** Chiral high-pressure liquid chromatography (CHPLC) of a) (R)-S12 and b) *rac*-S12.



## Antiviral Activity Assays

### Methods

Compound **2e** was evaluated for its inhibitory activity against herpes simplex virus type 1 (HSV-1) strain KOS and herpes simplex virus type 2 (HSV-2) strain G. The antiviral assays were based on inhibition of virus-induced cytopathicity in human embryonic lung (HEL) fibroblasts. Adherent human embryonic lung fibroblast cell cultures (HEL-299) were used (ATCC CCL 137). These cells were obtained from a male in 1965. The cells were used for research purposes only, and cultivated in a containment level 2 in accordance to the Advisory Committee on Dangerous Pathogens (ACDP) Guidelines.[3]

Confluent cell cultures in microtitre 96-well plates were inoculated with 100 CCID<sub>50</sub> of the virus (1 CCID<sub>50</sub> being the dose of the virus sufficient to infect 50% of the cell cultures) in the presence of varying concentrations of the test compounds. Viral cytopathicity was recorded as soon as it reached completion in the control virus-infected cell cultures that had not been treated with the test compounds. Antiviral activity is expressed as EC<sub>50</sub>, i.e., the compound concentration required to suppress virus-induced cytopathogenicity by 50%.

**Table S2.** Cytotoxicity and anti Herpes Simplex Virus activity in HEL (human embryonic lung) cell cultures.

| Compound    | Conc. Unit | Cytotoxicity <sup>a</sup> | Antiviral EC <sub>50</sub> <sup>b</sup> |                            |
|-------------|------------|---------------------------|-----------------------------------------|----------------------------|
|             |            |                           | Herpes simplex virus-1 (KOS)            | Herpes simplex virus-2 (G) |
| <b>2e</b>   | μM         | >100                      | >100                                    | >100                       |
| Brivudin    | μM         | >250                      | 0.04                                    | 112                        |
| Cidofovir   | μM         | >250                      | 2.0                                     | 1.4                        |
| Acyclovir   | μM         | >250                      | 0.4                                     | 0.4                        |
| Ganciclovir | μM         | >100                      | 0.02                                    | 0.05                       |

<sup>a</sup> Minimum cytotoxic concentration required to cause a microscopically detectable alteration of normal cell morphology. <sup>b</sup> Required to reduce virus-induced cytopathogenic effect by 50%.



## References

1. Kawasumi, M.; Kanoh, N.; Iwabuchi, Y. Concise Entry to Both Enantiomers of 8-Oxabicyclo[3.2.1]oct-3-en-2-one Based on Novel Oxidative Etherification: Formal Synthesis of (+)-Sundiversifolide. *Org. Lett.* **2011**, *13*, 3620-3623.
2. Gais, H. J.; Jagusch, T.; Spalthoff, N.; Gerhards, F.; Frank, M.; Raabe, G. Highly Selective Palladium Catalyzed Kinetic Resolution and Enantioselective Substitution of Racemic Allylic Carbonates with Sulfur Nucleophiles: Asymmetric Synthesis of Allylic Sulfides, Allylic Sulfones, and Allylic Alcohols. *Chem. Eur. J.* **2003**, *9*, 4202-4221.
3. Geraghty, R. J.; Capes-Davis, A.; Davis, J. M.; Downward, J. Freshney, R. I.; Knezevic, I.; Lovell-Badge, R.; Masters, J. R. W.; Meredith, J.; Stacey, G. N.; Thraves, P.; Vias, M. Guidelines for the Use of Cell Lines in Biomedical Research. *Br. J. Cancer.* **2014**, *111*, 1021-1046.
